# Supplementary material for: Transcriptomic Profiling of Rectus Abdominis Muscle in Women with Gestational Diabetes-Induced Myopathy: Characterization of Pathophysiology and Potential Muscle Biomarkers of Pregnancy-Specific Urinary Incontinence
Source: Int J Mol Sci. 2022 Oct 25;23(21):12864. doi: 10.3390/ijms232112864 (PMC9658972; doi:10.3390/ijms232112864)
Supplement: Supplementary file 1 [file ijms-23-12864-s001.zip]

Archive with 6 entries (6 files):
- Figure S1- PCA.png
- Figure S2.png
- Supplementary Materials- legends.pdf
- Table S1.Normalized counts of all genes identified  in the 12 samples divided into four groups..xlsx
- Table S2. List of differentially expressed genes in NG-C, NG-I and GDM-C women when compared with GDM-I women.xlsx
- Table S3- List of genes included in  Venn diagram.xlsx
