# Supplementary material for: Transcriptomic Profiling of Rectus Abdominis Muscle in Women with Gestational Diabetes-Induced Myopathy: Characterization of Pathophysiology and Potential Muscle Biomarkers of Pregnancy-Specific Urinary Incontinence
Source: Int J Mol Sci. 2022 Oct 25;23(21):12864. doi: 10.3390/ijms232112864 (PMC9658972; doi:10.3390/ijms232112864)
Supplement: Supplementary file 1 [file ijms-23-12864-s001.zip › Table S1.Normalized counts of all genes identified in the 12 samples divided into four groups..xlsx]

## Sheet: normalizado_selecionados
Table S1.Normalized counts of all genes identified in the 12 samples divided into four groups. ND-C: non-GDM women and continent women- no PSUI; ND-I: Non-GDM women and incontinente women- with PSUI; GDM-C: GDM women and continent women- no PSUI; GDM-I: GDM women and incontinent women- with PSUI.
	2cl	4cl	5cl	6cl	7cl	8cl	11cl	12cl	14cl	17cl	18cl	20cl
SCN4A	11.6638	32.9382	7.4757	24.6799	35.7338	13.7768	25.7105	37.467	23.9865	10.0689	6.32307	4.3541
BAIAP3	255.707	153.967	136.224	123.399	112.306	113.659	189.097	165.688	189.711	233.823	348.823	218.794			ND-C
PKD1	9.8694	16.0861	8.30633	13.3405	21.2701	15.1545	24.8812	8.32601	15.2641	5.59386	5.26923	3.26558			NC-I
CSDE1	13.4583	24.5121	14.9514	58.6981	125.068	40.6416	24.0518	44.9605	25.0768	10.0689	5.26923	6.53116			GDM-C
DCN	7.17774	55.1523	23.2577	47.3587	98.6935	22.7317	4.97623	18.3172	2.18059	0	2.10769	2.17705			GDM-I
MDH1	1.79444	26.0441	5.81443	21.3448	36.5846	16.5322	1.65874	11.6564	5.45148	3.35631	6.32307	0
ATP1A2	78.058	147.073	73.0957	151.414	212.701	128.813	149.287	132.384	146.1	49.226	59.0153	43.541
FHL1	88.8246	1288.42	157.82	847.12	1096.69	421.57	179.144	560.34	371.791	35.8007	96.9537	23.9476
RNF10	9.8694	24.5121	14.1208	28.682	29.7782	18.5987	13.2699	23.3128	21.8059	35.8007	11.5923	6.53116
VIM	14.3555	86.5585	31.5641	46.0247	71.4677	27.5536	6.63497	24.1454	6.54177	3.35631	7.37692	10.8853
SLC39A9	35.8887	76.6004	90.539	62.0332	57.8548	44.0857	47.2742	62.4451	59.9662	48.1072	34.7769	63.1345
ALG1	36.7859	42.1302	35.7172	28.015	19.5685	27.5536	41.4686	51.6213	35.9797	44.7509	82.1999	32.6558
MYOM2	28.711	114.135	48.1767	146.745	166.758	68.1951	44.7861	47.4583	107.939	40.2758	14.7538	17.4164
RIPOR1	17.0471	9.19205	9.96759	16.6756	8.50806	9.64376	12.4406	19.1498	8.72236	25.7317	26.3461	31.5673
MAP4	22.4305	45.9602	22.4271	80.7099	164.205	68.884	38.1511	54.9517	52.3342	12.3065	24.2384	13.0623
NOP16	1309.04	717.746	819.835	563.635	503.677	618.578	1034.23	864.24	904.945	1304.49	1241.43	955.726
PSD	52.9359	22.9801	31.5641	16.6756	22.1209	26.1759	42.298	44.9605	37.07	38.0382	43.2076	54.4263
YBX3	100.488	471.092	168.618	292.156	439.016	301.712	232.224	221.472	204.976	123.065	134.892	100.144
WNK1	7.17774	15.3201	37.3785	23.3458	20.4193	22.7317	8.29372	11.6564	20.7156	2.23754	4.21538	7.61968
CS	8.97218	30.6402	9.96759	24.6799	38.2863	17.221	13.2699	30.8062	10.903	3.35631	3.16154	2.17705
EIF4B	12.5611	29.8742	36.5478	40.6885	69.7661	35.1308	6.63497	9.15861	38.1603	5.59386	5.26923	22.8591
LIMCH1	1.79444	16.8521	2.4919	22.0118	34.0322	15.1545	4.97623	11.6564	13.0835	3.35631	4.21538	3.26558
YBX1	40.3748	123.327	47.3461	118.063	147.189	73.017	45.6155	71.6037	79.5916	19.0191	32.6692	25.0361
PRKCZ	11.6638	19.1501	21.5965	16.0086	9.35886	18.5987	27.3693	23.3128	20.7156	31.3256	37.9384	39.1869
SIRT2	6.28053	33.7042	6.64506	18.0096	22.9718	19.9764	11.6112	30.8062	19.6253	2.23754	8.43076	1.08853
PYGM	252.118	840.306	117.119	566.97	711.274	368.529	588.854	578.658	659.629	213.685	178.1	77.2854
BUD23	70.8802	41.3642	33.2253	28.015	17.0161	33.0643	65.5204	54.9517	56.6954	59.2949	81.1461	71.8427
CRMP1	29.6082	23.7461	78.9101	38.0204	31.4798	39.9527	9.95246	8.32601	11.9932	14.544	10.5385	44.6296
BCS1L	17.0471	14.5541	17.4433	14.0075	13.6129	17.9098	22.393	14.9868	18.535	23.4942	8.43076	15.2394
SLC25A3	7.17774	71.2384	8.30633	17.3426	51.8991	13.7768	11.6112	39.9648	20.7156	3.35631	3.16154	3.26558
ACTB	7.17774	60.5143	22.4271	34.6852	63.8104	35.8197	24.8812	49.1235	11.9932	10.0689	7.37692	2.17705
PPP1R12B	1.79444	22.2141	2.4919	27.348	34.883	15.1545	4.14686	6.66081	6.54177	5.59386	0	3.26558
ACTN2	81.6468	296.444	169.449	285.486	513.036	247.982	171.68	198.159	341.262	49.226	112.761	32.6558
UBE2A	5.38331	7.66004	7.4757	11.3394	22.9718	19.9764	8.29372	10.8238	18.535	7.8314	2.10769	5.44263
VDAC3	1.79444	32.9382	6.64506	18.6767	31.4798	13.088	0.829372	12.489	7.63207	3.35631	3.16154	5.44263
MYH7B	24.2249	29.8742	36.5478	22.6788	17.0161	45.4634	30.6868	23.3128	10.903	14.544	21.0769	21.7705
DUSP13	6.28053	35.2362	9.13696	20.0107	22.9718	12.3991	12.4406	20.815	17.4447	3.35631	11.5923	4.3541
PGM1	23.3277	143.243	18.2739	104.056	123.367	45.4634	53.9092	58.2821	46.8827	27.9693	17.9154	19.5935
DNM2	404.645	196.863	225.102	195.438	184.625	185.298	369.07	336.371	282.386	431.846	432.076	312.407
CACNA1S	32.2999	86.5585	23.2577	68.0364	93.5886	43.3969	55.5679	72.4363	87.2236	20.1379	34.7769	11.9738
NFE2L1	117.536	252.015	47.3461	214.782	277.363	141.901	247.982	239.789	146.1	57.0574	88.523	47.8952
AGBL5	732.13	472.624	443.558	374.867	395.625	379.551	548.215	598.64	536.425	777.546	1251.97	764.145
HADHA	4.48609	39.0662	9.13696	40.0214	39.9879	18.5987	22.393	17.4846	16.3544	3.35631	10.5385	2.17705
EIF2AK1	565.247	389.896	271.617	335.513	279.064	282.424	639.446	422.129	598.572	526.941	601.746	458.27
GNAS	58.3192	178.479	54.8218	138.074	179.52	75.7724	102.013	113.234	128.655	20.1379	70.6076	27.2132
C3orf18	19.7388	9.19205	14.1208	13.3405	13.6129	13.7768	14.0993	24.978	15.2641	23.4942	20.0231	19.5935
RPL6	1.79444	44.4282	9.13696	39.3544	42.5403	18.5987	6.63497	12.489	9.81266	1.11877	4.21538	1.08853
CCDC80	8.97218	33.7042	16.6127	34.0182	77.4233	25.4871	0.829372	14.9868	26.1671	6.71263	2.10769	13.0623
MYH7	1738.81	4909.32	2696.23	2869.54	3642.3	2634.12	2367.03	4187.98	4796.21	757.408	1104.43	636.788
HNRNPC	7.17774	19.1501	4.9838	16.0086	18.7177	15.1545	7.46435	10.8238	7.63207	5.59386	6.32307	1.08853
HSP90AB1	38.5804	121.029	60.6362	110.726	156.548	98.5041	39.8098	89.9209	112.3	35.8007	51.6384	33.7443
SETD1A	13.4583	11.4901	4.9838	11.3394	7.65725	5.51072	16.5874	13.3216	6.54177	11.1877	13.7	17.4164
CBARP	33.1971	29.8742	27.4109	21.3448	22.1209	24.1094	35.663	31.6388	53.4245	52.5823	44.2615	45.7181
MKNK2	28.711	43.6622	9.96759	33.3512	28.9274	30.309	111.136	37.467	18.535	3.35631	13.7	9.79674
YPEL1	43.0665	52.8543	48.1767	32.0171	25.5242	33.0643	49.7623	54.9517	52.3342	54.8198	52.6923	54.4263
PPP6R2	49.347	41.3642	33.2253	41.3555	33.1814	38.575	56.3973	54.9517	66.508	67.1263	56.9076	71.8427
CABP7	197.388	103.411	98.0147	88.7142	79.9757	99.1929	118.6	124.89	137.377	158.866	181.261	176.341
MYH9	18.8416	46.7262	28.2415	44.0236	45.0927	40.6416	33.1749	39.1322	17.4447	10.0689	27.4	10.8853
ST13	0.897218	22.2141	11.6289	34.0182	25.5242	25.4871	5.8056	8.32601	18.535	2.23754	3.16154	6.53116
POLR3H	2872	2687.14	2695.4	2161.16	1800.3	1941.15	2819.86	3258.8	4055.9	2545.21	2413.31	2048.61
KHNYN	646.894	373.81	425.284	394.878	342.875	392.639	403.904	607.799	540.786	642.175	831.484	496.368
ASB2	38.5804	111.837	8.30633	55.363	79.1249	46.8411	63.0323	89.9209	43.6118	17.9003	11.5923	7.61968
PSMC1	4.48609	13.0221	15.782	17.3426	38.2863	26.8648	11.6112	8.32601	16.3544	7.8314	4.21538	6.53116
SLA2	308.643	201.459	143.699	176.094	157.399	149.478	328.431	288.08	251.858	283.049	406.784	291.725
CST3	10.7666	50.5563	9.13696	26.0139	35.7338	18.5987	18.2462	21.6476	22.8962	4.47509	10.5385	10.8853
MYOM1	8.07496	65.8763	44.0235	110.059	216.105	64.7509	28.1986	61.6125	78.5013	24.613	10.5385	11.9738
MYL12A	12.5611	87.3245	68.1119	94.0504	118.262	82.6608	33.1749	78.2645	68.6886	13.4253	89.5768	14.1508
PGK1	9.8694	78.1324	4.9838	48.6927	60.4072	14.4656	15.7581	44.1278	39.2506	5.59386	2.10769	5.44263
MAGED2	9.8694	30.6402	6.64506	15.3416	11.0605	8.26608	15.7581	9.99121	11.9932	2.23754	3.16154	1.08853
FGF14	21.5332	30.6402	290.722	28.682	51.8991	57.1737	15.7581	13.3216	16.3544	16.7816	70.6076	109.941
TSC22D1	4.48609	19.1501	2.4919	25.3469	37.4355	13.088	9.95246	9.15861	6.54177	4.47509	5.26923	1.08853
CENPT	178.546	123.327	115.458	105.39	100.395	115.725	155.093	134.881	176.628	184.597	164.4	162.19
PSMD7	11.6638	25.2781	29.9028	27.348	30.629	26.1759	5.8056	15.8194	14.1738	11.1877	7.37692	9.79674
SETD6	45.7581	72.7704	112.966	48.6927	49.3467	64.0621	59.7148	48.2909	43.6118	32.4444	41.1	64.223
HAS3	186.621	124.859	111.305	90.7153	96.141	115.036	131.87	154.031	110.12	193.547	198.123	188.315
NPRL3	305.951	176.181	173.602	127.402	120.814	133.635	315.991	181.507	227.872	240.536	268.73	293.902
STUB1	303.26	214.481	200.183	180.763	176.968	191.497	277.01	253.943	334.721	302.068	417.323	280.84
ACSBG1	62.8053	180.777	289.06	262.14	313.096	236.961	117.771	111.569	238.775	115.233	182.315	161.102
TTC23	17.0471	25.2781	62.2975	62.7003	104.649	91.6157	14.0993	20.815	27.2574	50.3447	28.4538	26.1246
ZNF106	8.97218	71.2384	78.9101	55.363	109.754	59.9291	31.5161	35.8018	45.7924	20.1379	25.2923	26.1246
JPH1	2.69165	19.1501	7.4757	24.0129	34.0322	20.6652	4.14686	10.8238	11.9932	3.35631	6.32307	4.3541
MAP4K1	5.38331	22.9801	32.3947	22.0118	18.7177	30.309	12.4406	16.652	6.54177	7.8314	37.9384	4.3541
KLC3	33.1971	29.8742	29.9028	29.3491	38.2863	30.9978	48.9329	71.6037	82.8624	124.184	65.3384	55.5148
POLR2I	13.4583	19.9161	10.7982	10.0054	13.6129	7.57724	14.0993	21.6476	28.3477	31.3256	26.3461	17.4164
CDC37	20.636	30.6402	14.1208	28.015	41.6895	27.5536	31.5161	43.2952	23.9865	14.544	25.2923	7.61968
WDR83OS	24.2249	21.4481	17.4433	16.6756	22.1209	15.1545	29.8574	21.6476	10.903	19.0191	40.0461	26.1246
ISYNA1	51.1414	32.9382	29.9028	24.0129	24.6734	27.5536	32.3455	33.304	26.1671	44.7509	37.9384	62.046
SCN1B	8.97218	42.8962	3.32253	12.6735	22.9718	6.8884	27.3693	24.1454	16.3544	0	5.26923	1.08853
DNAJB6	3.58887	20.6821	15.782	29.3491	35.7338	17.9098	7.46435	9.15861	22.8962	3.35631	10.5385	7.61968
PPP3CB	0	27.5761	12.4595	33.3512	33.1814	13.7768	7.46435	12.489	17.4447	3.35631	4.21538	3.26558
PIGL	86.1329	79.6644	43.1929	43.3566	45.9435	61.9956	82.1078	81.5949	92.6751	114.115	132.784	88.1706
PFN1	8.97218	18.3841	3.32253	10.0054	17.0161	8.95492	10.7818	20.815	9.81266	7.8314	23.1846	8.70821
SLC25A11	88.8246	59.7483	44.0235	42.0225	52.75	42.0192	59.7148	63.2777	74.1401	95.0956	115.923	62.046
HSD17B1	200.08	114.135	121.272	105.39	80.8265	103.326	140.164	144.873	155.912	212.567	164.4	183.961
DUSP3	3.58887	36.7682	3.32253	27.348	39.1371	13.7768	7.46435	13.3216	16.3544	2.23754	4.21538	3.26558
YWHAE	8.97218	43.6622	14.9514	44.0236	45.0927	31.6866	14.9287	24.978	23.9865	13.4253	8.43076	10.8853
CRYAB	2214.33	1227.14	1299.94	1173.3	963.963	997.44	2003.76	1265.55	1542.77	1762.07	4016.2	2143.31
HSPA8	17.9444	106.475	37.3785	80.0429	136.98	65.4398	29.028	69.9385	44.7021	7.8314	37.9384	19.5935
EIF4G2	1.79444	26.0441	4.9838	39.3544	61.258	19.9764	4.97623	19.1498	15.2641	1.11877	5.26923	0
RPS13	6.28053	61.2803	4.9838	27.348	57.8548	19.2875	26.5399	31.6388	9.81266	1.11877	3.16154	1.08853
ATP5F1B	20.636	121.029	13.2901	62.0332	97.8427	30.309	28.1986	93.2513	45.7924	5.59386	25.2923	0
MRPL51	10.7666	13.7881	11.6289	24.0129	28.0766	14.4656	10.7818	11.6564	20.7156	21.2567	7.37692	13.0623
GAPDH	427.973	2109.58	233.408	990.531	1577.39	675.063	899.039	1447.06	1099.02	245.011	482.661	131.712
CAP2	0	21.4481	3.32253	22.6788	44.2419	10.3326	3.31749	7.49341	14.1738	0	3.16154	2.17705
RPS12	12.5611	78.1324	9.96759	32.0171	57.004	17.9098	24.0518	22.4802	8.72236	2.23754	9.48461	2.17705
SLC39A7	24.2249	28.3421	24.0884	24.0129	17.8669	14.4656	29.8574	38.2996	19.6253	36.9195	28.4538	29.3902
CLIC5	8.97218	35.2362	16.6127	64.0343	58.7056	31.6866	9.12309	24.1454	23.9865	7.8314	8.43076	13.0623
SPARC	43.9637	140.179	114.627	108.725	136.98	59.9291	32.3455	46.6257	27.2574	15.6628	34.7769	33.7443
IK	736.616	517.819	456.017	412.888	391.371	469.789	639.446	732.689	687.976	728.32	1064.38	675.975
BCL6	1.79444	36.0022	7.4757	26.0139	33.1814	15.8433	9.95246	6.66081	3.27089	3.35631	5.26923	3.26558
RPL24	16.1499	57.4503	17.4433	44.6906	53.6008	30.9978	26.5399	24.978	21.8059	12.3065	17.9154	7.61968
CYB561D2	122.022	72.7704	63.1281	63.3673	65.512	85.4161	116.112	99.0795	93.7654	143.203	113.815	115.384
FXR1	4.48609	14.5541	5.81443	21.3448	30.629	16.5322	9.12309	17.4846	10.903	4.47509	4.21538	4.3541
EIF4G1	33.1971	93.4525	27.4109	88.0472	109.754	36.5085	66.3497	59.9473	68.6886	16.7816	24.2384	19.5935
SPCS1	4.48609	17.6181	18.2739	9.33834	12.7621	14.4656	7.46435	7.49341	8.72236	3.35631	5.26923	7.61968
EEF1B2	23.3277	76.6004	7.4757	35.3523	74.0201	16.5322	20.7343	29.141	16.3544	2.23754	14.7538	1.08853
SPTBN1	1.79444	16.0861	9.13696	24.0129	50.1975	25.4871	1.65874	12.489	15.2641	5.59386	2.10769	5.44263
RTN4	4.48609	30.6402	5.81443	24.6799	51.0483	8.95492	1.65874	17.4846	9.81266	6.71263	1.05385	2.17705
LOXL3	94.2079	73.5364	84.7246	50.6938	50.1975	73.7059	90.4015	78.2645	68.6886	104.046	103.277	101.233
FN1	8.07496	44.4282	37.3785	27.348	62.9596	33.7532	1.65874	19.1498	11.9932	2.23754	13.7	8.70821
ELMOD3	53.8331	18.3841	42.3623	27.348	22.9718	28.2424	53.9092	31.6388	28.3477	36.9195	21.0769	39.1869
IGFBP5	36.7859	153.201	55.6524	217.45	178.669	125.369	34.8336	54.1191	106.849	31.3256	14.7538	53.3378
SMYD1	4.48609	38.3002	9.13696	47.3587	51.8991	23.4206	14.9287	14.9868	29.438	7.8314	6.32307	2.17705
HDLBP	8.97218	42.8962	22.4271	53.3619	75.7217	37.1974	10.7818	27.4758	51.2439	11.1877	9.48461	13.0623
C1orf21	8.07496	17.6181	9.96759	17.3426	28.9274	15.8433	11.6112	9.15861	3.27089	1.11877	9.48461	2.17705
MFN2	10.7666	27.5761	4.9838	23.3458	36.5846	17.9098	14.0993	20.815	13.0835	8.95017	2.10769	2.17705
AMPD1	5.38331	23.7461	1.66127	24.0129	39.1371	15.1545	0	5.82821	7.63207	0	1.05385	0
CD3EAP	127.405	101.113	123.764	78.7088	79.9757	90.238	92.8896	107.406	106.849	145.44	137	121.915
RPS25	53.8331	166.989	60.6362	126.735	165.056	97.1264	87.9134	98.2469	76.3207	55.9386	64.2845	42.4525
STBD1	183.93	75.0684	96.3534	114.728	81.6773	67.5063	124.406	113.234	149.37	183.479	311.938	260.158
NPC2	92.4135	45.9602	46.5154	54.0289	32.3306	40.6416	79.6197	84.9253	55.6051	77.1952	93.7922	76.1968
PPP1R3C	0.897218	29.1082	28.2415	22.6788	52.75	23.4206	4.14686	13.3216	10.903	3.35631	6.32307	10.8853
DUSP1	4.48609	16.0861	15.782	36.0193	42.5403	18.5987	11.6112	77.4319	0	2.23754	2.10769	0
MYOT	4.48609	57.4503	30.7334	59.3651	85.0806	45.4634	15.7581	41.63	21.8059	10.0689	13.7	6.53116
RPL21	10.7666	65.8763	9.96759	46.6917	62.9596	30.309	10.7818	46.6257	16.3544	1.11877	18.9692	3.26558
LDB3	75.3663	253.547	96.3534	236.126	326.709	132.946	100.354	188.168	196.253	62.6512	93.7922	32.6558
RPL5	8.07496	62.0463	14.9514	38.0204	52.75	24.7982	9.95246	17.4846	20.7156	2.23754	6.32307	4.3541
HNRNPA2B1	3.58887	27.5761	10.7982	30.0161	34.883	25.4871	14.0993	14.9868	6.54177	2.23754	3.16154	7.61968
WDR83	705.213	473.39	427.776	358.859	314.798	381.617	646.081	546.186	589.85	652.244	871.53	591.07
OPTN	0.897218	26.8101	9.96759	28.682	46.7943	22.7317	8.29372	26.6432	11.9932	2.23754	4.21538	1.08853
LRP1	14.3555	23.7461	21.5965	27.348	22.1209	16.5322	9.95246	11.6564	9.81266	4.47509	6.32307	6.53116
G0S2	24.2249	65.1103	44.8542	53.3619	53.6008	39.2639	27.3693	84.0927	42.5215	8.95017	10.5385	6.53116
SNX21	87.0302	55.9183	48.1767	45.3576	33.1814	50.2853	63.8616	62.4451	107.939	89.5017	92.7384	71.8427
ATP5F1E	4.48609	29.8742	3.32253	18.0096	46.7943	9.64376	8.29372	19.1498	7.63207	1.11877	8.43076	1.08853
MOCS1	44.8609	56.6843	78.0795	40.6885	62.1088	37.1974	131.041	53.2865	80.6819	66.0075	8.43076	63.1345
APOBEC2	10.7666	114.901	13.2901	62.7003	74.0201	28.9313	9.12309	58.2821	16.3544	7.8314	17.9154	2.17705
KLHDC3	7.17774	17.6181	3.32253	9.33834	16.1653	6.19956	9.12309	21.6476	13.0835	2.23754	8.43076	3.26558
AHNAK	15.2527	75.8344	39.0397	106.724	194.835	82.6608	22.393	43.2952	46.8827	11.1877	15.8077	19.5935
GOT2	7.17774	34.4702	7.4757	19.3437	32.3306	14.4656	8.29372	25.8106	7.63207	3.35631	4.21538	2.17705
DOK4	52.0387	38.3002	40.701	32.0171	23.8226	38.575	36.4924	31.6388	26.1671	72.7202	79.0384	35.9214
MYH2	183.032	585.993	230.916	1378.74	4374.84	962.998	454.496	369.675	1563.48	232.704	632.307	277.574
SLC25A35	142.658	87.3245	93.0309	65.3683	67.2137	76.4612	107.818	101.577	74.1401	142.084	171.777	132.8
MRPS7	44.8609	39.8322	25.7496	32.0171	37.4355	15.8433	38.1511	47.4583	28.3477	31.3256	54.7999	21.7705
RPL23	17.9444	66.6423	19.1046	42.6895	57.004	24.1094	19.9049	41.63	40.3409	3.35631	16.8615	4.3541
C3	9.8694	14.5541	11.6289	20.0107	33.1814	9.64376	4.14686	15.8194	13.0835	1.11877	2.10769	4.3541
MMP24	82.5441	53.6203	64.7894	38.6874	49.3467	46.8411	58.056	43.2952	64.3274	72.7202	99.0614	106.676
TMEM53	325.69	206.055	186.062	151.414	205.044	200.452	257.105	249.78	256.219	334.513	356.2	269.955
XRCC3	164.191	163.925	220.948	136.74	116.56	197.697	178.315	79.0971	68.6886	78.314	112.761	146.951
UBR4	5.38331	23.7461	3.32253	26.681	22.1209	17.221	9.12309	6.66081	8.72236	3.35631	3.16154	3.26558
PKMYT1	96.8996	81.1964	78.0795	30.6831	67.2137	57.1737	96.2071	115.732	115.571	61.5324	207.607	120.826
MRPS12	27.8138	13.0221	9.96759	14.0075	17.0161	11.0214	19.9049	15.8194	20.7156	42.5133	41.1	26.1246
CSRP3	18.8416	174.649	48.1767	62.7003	83.379	75.0835	17.4168	72.4363	35.9797	7.8314	29.5077	9.79674
KRI1	199.182	127.923	99.6759	100.721	119.964	112.281	246.323	168.185	283.477	204.735	222.361	200.289
COL5A1	7.17774	26.0441	28.2415	24.0129	37.4355	18.5987	9.95246	10.8238	13.0835	6.71263	9.48461	9.79674
TUBGCP2	274.549	160.095	147.853	144.744	124.218	135.013	248.812	212.313	261.671	243.892	267.677	287.371
LAMA5	647.791	365.384	269.125	282.151	280.766	365.085	609.588	542.856	667.261	635.462	741.907	746.729
YIPF2	401.056	411.344	279.923	237.461	249.286	315.489	381.511	397.983	514.619	562.742	499.523	355.948
FBP2	5.38331	49.7903	7.4757	32.6842	44.2419	7.57724	14.0993	39.9648	17.4447	6.71263	2.10769	2.17705
ACSS2	8.07496	22.2141	4.15316	10.6724	11.0605	14.4656	8.29372	16.652	16.3544	4.47509	8.43076	3.26558
MRPS25	18.8416	56.6843	79.7408	47.3587	49.3467	42.7081	19.0756	18.3172	49.0633	31.3256	35.8307	31.5673
PSMC3IP	227.893	170.053	158.651	103.389	115.71	135.701	183.291	195.661	167.905	250.605	183.369	142.597
THOC6	40.3748	24.5121	34.8866	23.3458	18.7177	33.7532	37.3217	37.467	73.0498	55.9386	86.4153	67.4886
CKMT2	7.17774	50.5563	17.4433	42.0225	42.5403	18.5987	15.7581	55.7843	19.6253	6.71263	6.32307	2.17705
LLGL1	45.7581	43.6622	29.9028	19.3437	24.6734	30.9978	58.8854	41.63	77.411	63.77	73.7692	31.5673
SERPINF1	34.9915	52.8543	24.919	32.6842	42.5403	29.6201	19.9049	32.4714	26.1671	10.0689	12.6461	4.3541
POPDC3	8.07496	9.95805	14.9514	16.6756	20.4193	13.7768	5.8056	13.3216	4.36118	10.0689	9.48461	7.61968
GPS2	1353	945.249	741.755	817.771	763.173	772.878	1481.26	1357.14	1248.39	1210.51	1840.01	1078.73
NIP7	20.636	6.89404	3.32253	6.00322	5.95564	6.19956	14.9287	15.8194	13.0835	20.1379	16.8615	27.2132
KCP	345.429	193.033	171.941	172.092	136.129	152.922	204.855	222.304	235.504	278.574	217.092	299.345
TSPAN31	295.185	183.075	195.199	132.071	131.875	149.478	226.419	238.124	173.357	228.229	358.307	238.387
SLC9A5	306.849	150.903	189.384	172.759	165.056	185.298	223.93	363.847	316.186	344.582	326.692	305.876
GLUL	26.0193	45.9602	14.9514	39.3544	81.6773	35.8197	140.993	15.8194	7.63207	19.0191	4.21538	5.44263
SMPD4	501.545	252.781	278.262	152.081	148.04	211.474	334.237	358.018	270.393	251.724	388.869	452.827
WDR38	273.652	216.013	205.166	137.407	139.532	194.253	246.323	215.644	310.734	333.394	393.084	416.906
TLN1	14.3555	40.5982	11.6289	30.6831	27.2258	18.5987	27.3693	30.8062	18.535	4.47509	7.37692	9.79674
CD72	322.101	167.755	179.417	160.753	131.875	154.989	317.649	240.622	296.56	243.892	343.553	409.286
TMEM8B	61.9081	28.3421	37.3785	19.3437	17.8669	24.7982	47.2742	36.6344	20.7156	40.2758	54.7999	58.7804
ARHGEF39	295.185	184.607	196.86	150.747	160.802	188.053	398.928	242.287	221.33	307.662	384.653	220.971
RPS6	11.6638	69.7064	21.5965	47.3587	73.1693	33.0643	11.6112	35.8018	15.2641	8.95017	9.48461	8.70821
NUMA1	56.5247	53.6203	63.9587	61.3662	58.7056	68.1951	60.5441	52.4539	32.7089	34.6819	21.0769	30.4787
HADHB	2.69165	31.4062	2.4919	28.015	29.7782	11.0214	12.4406	16.652	21.8059	3.35631	2.10769	1.08853
SLC5A6	315.821	181.543	169.449	157.418	147.189	164.633	266.228	229.798	288.928	327.8	307.723	341.797
SLC3A1	7.17774	16.0861	68.1119	44.6906	62.9596	67.5063	19.9049	40.7974	69.7789	36.9195	91.6845	51.1607
TACC2	34.9915	58.2163	22.4271	70.7045	91.887	72.3282	39.8098	71.6037	41.4312	23.4942	17.9154	14.1508
RPS24	18.8416	73.5364	34.8866	62.7003	102.947	53.0407	24.8812	39.9648	37.07	7.8314	38.9923	9.79674
MYPN	5.38331	38.3002	14.1208	50.0268	63.8104	31.6866	11.6112	20.815	39.2506	6.71263	6.32307	2.17705
CILP	15.2527	47.4922	11.6289	22.0118	32.3306	6.8884	8.29372	11.6564	11.9932	4.47509	5.26923	4.3541
HERC3	233.277	497.903	630.45	493.598	487.512	491.832	267.058	258.939	502.626	378.145	434.184	509.43
TARBP2	45.7581	24.5121	17.4433	23.3458	8.50806	9.64376	47.2742	35.8018	19.6253	59.2949	59.0153	35.9214
TSPAN3	4.48609	26.8101	11.6289	16.0086	28.9274	15.1545	12.4406	11.6564	10.903	8.95017	3.16154	2.17705
UNC45A	67.2914	52.0883	42.3623	36.0193	22.9718	42.0192	52.2504	70.7711	49.0633	87.2642	92.7384	33.7443
RPL3L	45.7581	80.4304	24.919	62.7003	84.2298	46.8411	66.3497	61.6125	46.8827	19.0191	24.2384	8.70821
UNC45B	8.97218	36.0022	9.13696	26.681	36.5846	13.7768	14.9287	16.652	22.8962	4.47509	4.21538	2.17705
CSNK1D	41.272	39.0662	141.208	46.0247	165.056	43.3969	301.062	94.0839	280.206	140.965	56.9076	34.8328
ERBB2	115.741	65.1103	66.4506	54.696	50.1975	58.5514	119.43	79.9297	77.411	80.5516	165.454	89.2591
MIEN1	34.0943	22.9801	29.9028	16.0086	23.8226	14.4656	24.0518	24.1454	27.2574	48.1072	52.6923	32.6558
FEM1A	39.4776	121.795	24.919	79.3758	114.859	51.663	78.7903	100.745	52.3342	24.613	30.5615	9.79674
APP	4.48609	19.9161	23.2577	24.6799	38.2863	31.6866	10.7818	10.8238	15.2641	7.8314	4.21538	11.9738
CARM1	88.8246	74.3024	68.9425	46.0247	55.3024	61.9956	94.5484	97.4143	70.8692	78.314	98.0076	96.8788
MYOM3	22.4305	93.4525	31.5641	51.3608	85.0806	37.1974	91.2309	80.7623	46.8827	7.8314	22.1307	11.9738
SERBP1	2.69165	9.95805	9.13696	16.0086	38.2863	19.9764	4.97623	11.6564	4.36118	4.47509	7.37692	5.44263
TPM3	96.8996	514.755	208.489	306.831	338.621	243.849	154.263	291.41	307.463	43.6321	69.5538	42.4525
SLC39A1	10.7666	9.95805	5.81443	8.67131	9.35886	7.57724	8.29372	11.6564	13.0835	6.71263	13.7	8.70821
SNAP47	216.23	102.645	104.66	102.055	74.0201	104.015	199.049	162.357	164.635	228.229	292.969	205.731
EPHX1	34.0943	32.1722	45.6848	33.3512	30.629	30.9978	28.1986	25.8106	6.54177	7.8314	12.6461	9.79674
RPS27A	12.5611	37.5342	8.30633	26.0139	52.75	17.221	7.46435	14.9868	14.1738	2.23754	6.32307	4.3541
ABHD1	70.8802	36.0022	29.9028	32.0171	27.2258	33.0643	116.112	82.4275	75.2304	44.7509	86.4153	32.6558
ANKMY1	154.322	91.1545	71.4344	79.3758	70.6169	79.2166	108.648	129.886	154.822	166.697	177.046	186.138
CAND2	7.17774	24.5121	6.64506	21.3448	16.1653	15.1545	6.63497	27.4758	10.903	2.23754	6.32307	3.26558
DDIT4L	2.69165	48.2583	1.66127	30.0161	58.7056	16.5322	0	8.32601	9.81266	4.47509	4.21538	2.17705
RPS3A	9.8694	119.497	29.0722	78.7088	102.947	44.0857	24.8812	52.4539	54.5148	10.0689	26.3461	3.26558
BTF3	5.38331	20.6821	4.9838	24.0129	31.4798	18.5987	11.6112	10.8238	3.27089	5.59386	5.26923	2.17705
RMND5B	337.354	247.419	203.505	160.086	169.31	185.298	281.986	268.098	227.872	295.356	481.607	286.282
MDH2	8.07496	54.3863	12.4595	28.015	35.7338	14.4656	21.5637	39.9648	32.7089	0	12.6461	1.08853
RPL10	1702.02	1225.61	1065.7	1229.33	1181.77	1050.48	1998.79	1490.36	1891.66	1948.9	2138.25	1787.36
RPL7	2.69165	38.3002	14.1208	30.6831	61.258	28.2424	8.29372	11.6564	20.7156	6.71263	6.32307	9.79674
GSN	80.7496	200.693	52.3299	118.73	152.294	84.0385	62.2029	105.74	34.8894	26.8505	33.723	22.8591
RPL7A	34.0943	121.029	29.9028	65.3683	73.1693	50.2853	72.9847	94.0839	37.07	22.3754	35.8307	18.5049
TAF5	51.1414	58.2163	82.2327	38.6874	44.2419	42.7081	56.3973	62.4451	81.7721	54.8198	141.215	71.8427
SERPING1	7.17774	20.6821	14.9514	13.3405	17.0161	8.95492	6.63497	12.489	2.18059	1.11877	1.05385	1.08853
RPS3	25.1221	80.4304	17.4433	32.6842	38.2863	22.7317	38.9805	42.4626	29.438	6.71263	15.8077	5.44263
TKFC	150.733	134.817	84.7246	71.3716	59.5564	66.1286	121.088	75.7667	128.655	134.253	124.354	99.0559
MRPL49	17.0471	21.4481	13.2901	12.0064	20.4193	18.5987	24.0518	17.4846	15.2641	23.4942	11.5923	14.1508
FAU	9.8694	43.6622	9.13696	22.6788	26.375	23.4206	21.5637	24.978	20.7156	3.35631	12.6461	0
ALDOA	186.621	842.604	114.627	452.909	732.544	282.424	408.88	661.085	560.412	110.758	167.561	58.7804
DOC2A	83.4413	50.5563	54.8218	40.6885	39.9879	46.1523	64.691	59.9473	70.8692	92.858	92.7384	78.3739
HIRIP3	67.2914	41.3642	48.1767	30.0161	40.8387	48.9076	67.1791	63.2777	61.0565	77.1952	74.823	59.8689
ABCB9	684.577	409.812	364.648	363.528	326.709	363.707	631.981	489.569	554.96	701.47	758.768	738.021
UBC	47.5526	256.611	73.9263	160.086	233.121	127.435	211.49	279.754	121.023	23.4942	33.723	11.9738
ACSL1	0.897218	29.8742	5.81443	27.348	42.5403	7.57724	3.31749	11.6564	19.6253	0	1.05385	2.17705
SLC25A4	12.5611	119.497	14.9514	71.3716	100.395	30.309	29.028	54.9517	21.8059	4.47509	9.48461	7.61968
ATP5F1A	5.38331	68.9404	19.9352	46.6917	62.9596	20.6652	9.12309	29.141	18.535	1.11877	3.16154	5.44263
PFKM	36.7859	146.307	17.4433	114.061	148.04	37.8862	62.2029	89.0883	62.1468	20.1379	20.0231	11.9738
SLC5A10	52.0387	28.3421	38.2091	29.3491	21.2701	23.4206	43.9567	52.4539	29.438	55.9386	71.6615	46.8066
OBSCN	164.191	281.123	142.869	353.523	435.613	309.289	481.036	390.49	462.285	146.559	228.684	116.472
ATP5MC3	8.97218	22.2141	6.64506	12.6735	12.7621	6.8884	8.29372	12.489	6.54177	4.47509	11.5923	5.44263
PDLIM3	67.2914	317.892	81.402	284.819	322.455	135.013	139.334	181.507	191.892	26.8505	134.892	38.0984
LARP1	3.58887	19.9161	23.2577	29.3491	22.1209	20.6652	11.6112	5.82821	14.1738	6.71263	5.26923	5.44263
TTN	106.769	481.051	213.473	957.846	2233.36	702.617	460.301	731.024	624.739	151.034	423.646	118.649
UQCRB	7.17774	43.6622	13.2901	18.6767	39.9879	20.6652	7.46435	15.8194	15.2641	1.11877	6.32307	4.3541
RPL30	23.3277	76.6004	18.2739	41.3555	53.6008	29.6201	24.8812	45.7931	16.3544	3.35631	18.9692	7.61968
EEF1A1	11.6638	55.1523	20.7658	52.0279	87.633	33.0643	8.29372	27.4758	23.9865	0	1.05385	4.3541
SYN2	30.5054	13.0221	26.5803	17.3426	11.0605	11.7103	27.3693	19.9824	25.0768	31.3256	40.0461	50.0722
RER1	217.127	129.455	126.256	122.065	96.9918	108.148	202.367	176.511	150.461	228.229	274	182.872
BTG2	6.28053	15.3201	16.6127	35.3523	49.3467	35.8197	20.7343	79.9297	5.45148	4.47509	7.37692	2.17705
PCNT	2.69165	25.2781	2.4919	11.3394	34.0322	18.5987	12.4406	11.6564	10.903	2.23754	5.26923	3.26558
CFAP157	77.1608	34.4702	28.2415	38.0204	28.0766	41.3304	62.2029	78.2645	53.4245	82.7891	107.492	85.9936
PCSK7	846.974	558.417	1048.26	315.502	364.996	228.695	597.148	527.036	242.046	465.409	613.338	1087.44
MYL3	56.5247	235.163	63.9587	98.7195	104.649	86.105	70.4966	175.679	94.8557	17.9003	49.5307	6.53116
MRNIP	7266.57	3842.28	2903.06	3519.22	2979.52	3880.92	6816.61	6341.09	5458.02	6963.23	6450.59	5640.74
COX7A1	25.1221	85.0264	13.2901	44.0236	83.379	42.7081	66.3497	100.745	34.8894	4.47509	21.0769	6.53116
SNRNP25	38.5804	32.1722	29.9028	24.0129	14.4637	22.0429	31.5161	46.6257	37.07	54.8198	55.8538	31.5673
JMJD8	1378.13	920.737	696.901	705.711	614.282	712.949	1253.18	1159.81	1280.01	1479.02	1564.96	1083.08
OBSCN-AS1	337.354	62.0463	181.078	208.111	249.286	303.778	476.059	269.763	472.098	686.926	270.838	409.286
COQ8A	59.2164	124.093	29.0722	64.7013	85.0806	54.4183	55.5679	121.56	47.973	19.0191	32.6692	14.1508
PDLIM5	5.38331	52.8543	5.81443	30.0161	59.5564	24.1094	10.7818	20.815	19.6253	3.35631	2.10769	0
S100A9	0	14.5541	6.64506	12.6735	61.258	26.8648	9.12309	23.3128	3.27089	2.23754	2.10769	1.08853
LMOD3	4.48609	18.3841	7.4757	29.3491	51.0483	30.9978	5.8056	26.6432	21.8059	13.4253	12.6461	4.3541
IGFN1	26.9165	7.66004	34.8866	250.801	59.5564	55.796	65.5204	38.2996	82.8624	59.2949	20.0231	53.3378
FSTL1	0.897218	25.2781	22.4271	20.6777	61.258	11.7103	2.48812	2.4978	7.63207	4.47509	0	7.61968
ARPC2	4.48609	19.9161	8.30633	28.015	34.883	9.64376	9.95246	6.66081	7.63207	3.35631	4.21538	0
GYG1	3.58887	32.9382	3.32253	24.0129	44.2419	4.13304	9.12309	16.652	9.81266	4.47509	3.16154	0
FYCO1	4.48609	27.5761	5.81443	46.0247	79.9757	18.5987	8.29372	16.652	34.8894	4.47509	2.10769	5.44263
FBXO40	0.897218	19.9161	6.64506	23.3458	36.5846	10.3326	6.63497	8.32601	11.9932	1.11877	3.16154	2.17705
SGMS2	26.9165	13.0221	22.4271	10.6724	6.80645	14.4656	12.4406	12.489	17.4447	27.9693	49.5307	26.1246
CMYA5	16.1499	111.071	33.2253	117.396	272.258	90.238	65.5204	98.2469	49.0633	27.9693	43.2076	7.61968
GDF9	1512.71	919.205	942.768	748.401	632.149	739.814	1215.03	1377.95	1408.66	1006.89	2003.36	1034.1
COG5	69.0858	111.071	142.869	150.08	187.177	172.21	72.9847	96.5817	147.19	89.5017	77.9845	81.6395
COL1A2	19.7388	94.9845	84.7246	51.3608	124.218	40.6416	11.6112	27.4758	23.9865	12.3065	23.1846	4.3541
CTSB	22.4305	36.7682	14.9514	37.3533	34.883	30.9978	14.0993	19.9824	15.2641	13.4253	10.5385	4.3541
CA3	104.975	567.609	235.069	971.854	869.523	371.974	149.287	375.503	448.111	49.226	139.108	63.1345
VCP	9.8694	49.0243	9.13696	37.3533	38.2863	15.1545	26.5399	25.8106	25.0768	8.95017	8.43076	3.26558
CFL2	2.69165	39.8322	7.4757	21.3448	58.7056	30.309	4.97623	16.652	9.81266	3.35631	3.16154	1.08853
PACSIN3	24.2249	36.0022	32.3947	49.3598	38.2863	48.9076	51.4211	64.9429	37.07	20.1379	63.2307	33.7443
PSMC3	12.5611	45.9602	6.64506	23.3458	24.6734	11.7103	27.3693	20.815	18.535	5.59386	27.4	2.17705
HIF1AN	398.365	300.274	308.995	232.791	242.48	256.248	355.801	366.344	262.761	340.107	443.669	336.355
BRD7	61.9081	124.093	196.029	129.403	131.875	149.478	6.63497	40.7974	41.4312	70.4826	45.3153	114.295
DPCD	105.872	51.3223	58.9749	45.3576	40.8387	51.663	92.8896	93.2513	95.946	119.709	66.3922	92.5247
CUL5	45.7581	24.5121	27.4109	11.3394	28.9274	23.4206	34.8336	34.9692	30.5283	36.9195	52.6923	50.0722
SYNPO2L	15.2527	54.3863	36.5478	51.3608	66.3628	56.4849	48.9329	45.7931	62.1468	21.2567	36.8846	21.7705
TAF10	653.175	464.964	545.726	377.536	373.504	436.036	515.869	489.569	668.351	645.531	940.03	556.237
B2M	9.8694	60.5143	20.7658	30.6831	77.4233	24.7982	4.97623	19.1498	4.36118	5.59386	2.10769	5.44263
ACSF2	122.919	22.2141	232.577	33.3512	29.7782	18.5987	122.747	107.406	10.903	22.3754	31.6154	78.3739
JSRP1	2898.91	1743.43	1431.18	1407.42	1233.67	1379.75	2426.74	1929.14	2456.44	2627.99	3942.43	2100.86
NDUFV1	10.7666	29.8742	5.81443	20.6777	22.1209	11.0214	9.12309	35.8018	10.903	1.11877	5.26923	1.08853
ZNF232	26.0193	8.42604	14.9514	13.3405	8.50806	15.1545	35.663	29.141	20.7156	33.5631	40.0461	26.1246
SRRM2	23.3277	45.1942	34.0559	54.696	68.9153	55.1072	36.4924	37.467	53.4245	15.6628	30.5615	18.5049
LTBP3	104.077	65.1103	44.8542	49.3598	39.9879	57.8625	103.671	64.9429	79.5916	90.6205	101.169	96.8788
DEGS2	79.8524	62.0463	72.2651	53.3619	32.3306	37.8862	64.691	59.1147	38.1603	70.4826	76.9307	88.1706
TNXB	10.7666	26.0441	10.7982	16.6756	22.9718	15.1545	7.46435	13.3216	9.81266	5.59386	1.05385	2.17705
CCDC110	24.2249	5.36203	11.6289	6.67024	8.50806	4.82188	13.2699	8.32601	10.903	20.1379	22.1307	30.4787
MYL1	34.9915	713.15	75.5876	346.852	727.439	166.01	78.7903	261.437	208.246	8.95017	106.438	19.5935
COL3A1	32.2999	214.481	121.272	108.725	256.943	104.015	9.95246	32.4714	23.9865	10.0689	23.1846	20.682
TMEM223	154.322	97.2825	97.1841	60.6992	71.4677	73.017	85.4253	91.5861	67.5983	117.471	115.923	103.41
C22orf15	277.24	302.572	242.545	210.78	191.431	189.431	338.384	474.583	423.035	305.425	350.93	208.997
CNBP	5.38331	94.9845	25.7496	70.7045	102.097	35.1308	18.2462	35.8018	13.0835	5.59386	10.5385	5.44263
YWHAG	8.07496	52.8543	7.4757	44.0236	50.1975	14.4656	5.8056	12.489	23.9865	5.59386	3.16154	5.44263
SIK2	4.48609	16.8521	26.5803	9.33834	20.4193	16.5322	9.12309	6.66081	14.1738	6.71263	6.32307	8.70821
ELP5	293.39	179.245	187.723	136.74	171.012	175.654	264.57	242.287	335.811	262.911	279.269	324.381
UBB	85.2357	155.499	46.5154	120.064	133.576	67.5063	104.501	198.159	107.939	21.2567	44.2615	21.7705
METTL7B	112.152	95.7505	84.7246	55.363	47.6451	83.3496	116.112	80.7623	98.1266	110.758	206.554	133.889
PFKFB3	6.28053	36.0022	3.32253	18.0096	33.1814	47.5299	52.2504	24.1454	15.2641	10.0689	1.05385	1.08853
LMOD2	9.8694	58.2163	35.7172	89.3812	96.141	65.4398	20.7343	87.4231	69.7789	20.1379	31.6154	4.3541
PKIA	1.79444	25.2781	7.4757	23.3458	57.8548	15.8433	9.95246	14.9868	5.45148	1.11877	0	1.08853
PIK3CD	26.0193	29.1082	28.2415	15.3416	15.3145	19.9764	16.5874	23.3128	10.903	17.9003	13.7	23.9476
RPS7	6.28053	21.4481	4.9838	15.3416	31.4798	11.7103	12.4406	10.8238	4.36118	0	5.26923	1.08853
DRC3	21.5332	24.5121	28.2415	25.3469	17.8669	17.221	22.393	12.489	18.535	22.3754	14.7538	25.0361
LAMB2	6.28053	22.9801	16.6127	30.0161	28.0766	13.088	12.4406	19.9824	11.9932	3.35631	10.5385	6.53116
CSDC2	68.1886	19.1501	32.3947	23.3458	26.375	23.4206	38.1511	27.4758	33.7992	48.1072	69.5538	30.4787
SYNPO2	34.0943	83.4944	83.8939	178.762	256.943	144.656	109.477	98.2469	207.156	42.5133	109.6	67.4886
RSPH9	513.209	335.51	307.334	229.456	188.879	267.959	730.677	436.283	478.64	538.129	604.907	455.004
RAD9A	156.116	116.433	93.8615	64.0343	68.9153	84.7273	139.334	126.555	115.571	144.322	187.584	136.066
LRRC20	8.07496	28.3421	4.15316	19.3437	34.883	17.221	24.0518	25.8106	14.1738	4.47509	8.43076	3.26558
SNX32	462.965	297.21	334.745	225.454	251.838	278.98	309.356	338.869	310.734	340.107	513.223	357.037
TRMT112	436.945	320.19	269.956	196.772	184.625	226.628	383.17	355.521	442.66	392.689	417.323	318.938
ESRRA	119.33	63.5783	51.4992	42.6895	39.9879	51.663	77.1316	104.075	87.2236	116.352	121.192	119.738
GPR137	509.62	229.035	215.965	186.1	159.101	148.101	299.403	269.763	387.055	372.551	361.469	481.129
DAG1	4.48609	20.6821	7.4757	16.0086	29.7782	9.64376	18.2462	9.99121	15.2641	2.23754	7.37692	0
CSPG4	10.7666	13.0221	9.96759	4.66917	7.65725	11.7103	44.7861	10.8238	4.36118	2.23754	13.7	13.0623
UQCRH	7.17774	22.9801	8.30633	16.6756	22.1209	13.088	10.7818	12.489	10.903	1.11877	2.10769	2.17705
EIF1	26.9165	124.093	17.4433	64.0343	83.379	35.1308	43.1273	90.7535	33.7992	0	10.5385	1.08853
PITPNA	74.4691	60.5143	63.1281	60.6992	74.0201	70.2617	68.0085	62.4451	46.8827	123.065	107.492	97.9674
ATP2A2	22.4305	293.38	88.0471	221.452	313.947	139.146	46.4448	155.696	129.745	19.0191	13.7	19.5935
RPL4	22.4305	153.967	45.6848	93.3834	116.56	61.3067	36.4924	73.2689	44.7021	19.0191	11.5923	10.8853
MLXIP	9.8694	21.4481	2.4919	34.0182	28.9274	7.57724	30.6868	21.6476	13.0835	4.47509	5.26923	6.53116
A2M	2.69165	51.3223	11.6289	28.682	53.6008	26.8648	8.29372	9.99121	17.4447	8.95017	7.37692	7.61968
TUBB6	196.491	286.485	333.084	326.842	297.782	339.598	191.585	152.366	331.45	168.935	143.323	220.971
ZNF575	129.199	62.0463	56.483	49.3598	49.3467	44.0857	81.2784	87.4231	83.9527	108.521	89.5768	92.5247
SCAND2P	148.938	139.413	167.788	152.748	160.802	135.013	157.581	129.053	126.474	142.084	134.892	124.092
EFCAB5	41.272	20.6821	29.9028	21.3448	15.3145	22.0429	36.4924	41.63	19.6253	29.0881	70.6076	45.7181
C10orf71	12.5611	44.4282	21.5965	60.0322	64.6612	38.575	23.2224	30.8062	69.7789	14.544	22.1307	5.44263
AC021054.1	82.5441	39.0662	67.2813	26.0139	17.0161	24.7982	84.5959	44.1278	81.7721	55.9386	124.354	50.0722
CSTF2T	5.38331	14.5541	6.64506	5.33619	14.4637	8.26608	13.2699	6.66081	16.3544	1.11877	8.43076	9.79674
POLR2L	580.5	324.02	250.851	207.444	164.205	208.718	342.531	394.653	268.213	392.689	627.038	517.05
AC025171.1	12.5611	9.95805	19.9352	12.0064	9.35886	4.82188	23.2224	42.4626	17.4447	24.613	57.9615	16.3279
RPS27	26.9165	82.7284	18.2739	40.0214	58.7056	35.1308	41.4686	62.4451	23.9865	10.0689	12.6461	4.3541
PDE4DIP	13.4583	83.4944	27.4109	131.404	219.508	69.5728	20.7343	39.9648	55.6051	6.71263	17.9154	6.53116
DALRD3	485.395	263.505	280.754	247.466	179.52	298.956	390.634	357.186	294.38	401.639	493.199	459.358
SELENOW	22.4305	95.7505	3.32253	44.0236	54.4516	21.354	28.1986	50.7887	29.438	6.71263	12.6461	5.44263
GADD45GIP1	2203.57	1887.43	1312.4	1334.05	1400.43	1408.68	2483.97	2006.57	3102.98	2698.48	2778.99	1651.29
PACS2	17.9444	16.0861	7.4757	18.6767	24.6734	13.7768	15.7581	20.815	8.72236	10.0689	9.48461	18.5049
SHARPIN	673.811	363.086	313.979	310.833	307.141	335.465	597.977	511.217	609.475	713.776	696.592	608.486
GCC1	245.838	146.307	162.804	119.397	105.5	132.257	208.172	189.833	137.377	194.666	247.654	207.909
LSMEM2	248.529	172.351	130.409	142.076	92.7378	133.635	258.764	203.987	223.511	212.567	301.4	204.643
CIITA	747.383	539.267	383.752	430.897	356.488	332.021	605.441	578.658	532.064	779.784	827.268	525.758
PCBP1-AS1	3990.83	3234.07	2815.01	2699.45	2543.06	2689.23	4616.28	4188.82	4718.8	4836.45	3220.55	4286.62
FIZ1	77.1608	42.8962	29.9028	32.0171	30.629	33.0643	55.5679	66.6081	78.5013	73.8389	69.5538	72.9313
EXOC3	84.3385	85.0264	83.8939	84.712	77.4233	97.1264	97.0365	87.4231	90.4945	118.59	114.869	94.7018
TMEM102	12.5611	6.89404	9.13696	8.67131	2.55242	8.95492	14.0993	32.4714	15.2641	13.4253	40.0461	19.5935
LRRC75A	803.01	614.335	670.321	394.878	342.875	456.012	573.925	610.296	611.656	817.822	892.607	554.06
SYNM	13.4583	39.0662	20.7658	118.73	183.774	71.6393	14.9287	28.3084	70.8692	27.9693	16.8615	26.1246
PRR34	161.499	128.689	108.813	84.045	85.9314	76.4612	198.22	108.238	140.648	125.302	212.877	125.181
BRICD5	39.4776	21.4481	26.5803	18.0096	17.0161	17.221	34.0042	30.8062	70.8692	53.701	47.423	34.8328
ANXA2	6.28053	39.8322	4.9838	24.6799	39.9879	12.3991	6.63497	22.4802	6.54177	3.35631	5.26923	6.53116
GDPGP1	127.405	46.7262	39.8704	36.0193	44.2419	45.4634	79.6197	70.7711	62.1468	89.5017	110.654	72.9313
ABHD16B	27.8138	5.36203	21.5965	14.0075	11.0605	16.5322	17.4168	30.8062	16.3544	25.7317	22.1307	34.8328
CCDC159	621.772	330.148	278.262	286.82	288.423	290.002	439.567	482.076	538.606	682.451	629.146	531.201
ACTG1	11.6638	34.4702	11.6289	19.3437	43.3911	23.4206	14.0993	26.6432	15.2641	4.47509	10.5385	6.53116
LRTOMT	322.999	181.543	210.15	186.767	213.552	150.856	308.526	254.776	237.684	341.225	451.046	261.246
NR2C2AP	75.3663	46.7262	39.0397	34.0182	28.9274	35.1308	52.2504	64.1103	51.2439	71.6014	71.6615	63.1345
AP001062.1	122.919	72.0044	88.0471	56.697	53.6008	57.8625	92.0603	76.5993	55.6051	88.383	105.385	117.561
TXNRD2	69.0858	40.5982	39.0397	42.0225	44.2419	30.9978	56.3973	92.4187	47.973	60.4137	101.169	67.4886
EIF4ENIF1	8.97218	7.66004	9.13696	26.0139	15.3145	18.5987	9.12309	4.163	13.0835	6.71263	2.10769	8.70821
BRF1	183.93	116.433	100.507	91.3823	104.649	95.7487	215.637	144.04	171.176	198.023	208.661	170.899
ADSSL1	10.7666	59.7483	21.5965	36.6863	65.512	28.9313	51.4211	26.6432	29.438	11.1877	15.8077	6.53116
CCDC137	23.3277	11.4901	11.6289	14.0075	16.1653	8.95492	25.7105	12.489	17.4447	27.9693	28.4538	33.7443
STAC3	84.3385	225.971	74.757	207.444	163.355	114.347	133.529	96.5817	90.4945	42.5133	99.0614	43.541
SRL	26.9165	109.539	24.919	66.0354	125.068	38.575	73.8141	86.5905	62.1468	23.4942	13.7	17.4164
MORF4L1	4.48609	19.9161	15.782	24.6799	33.1814	17.221	9.95246	8.32601	22.8962	3.35631	8.43076	6.53116
RPS23	14.3555	44.4282	14.1208	47.3587	56.1532	28.9313	19.0756	35.8018	30.5283	4.47509	15.8077	8.70821
CFAP73	206.36	145.541	98.8453	91.3823	81.6773	137.079	194.073	133.216	157.003	187.954	196.015	187.227
TMEM262	209.052	138.647	161.143	113.394	108.903	132.257	142.652	166.52	170.086	212.567	230.792	181.784
SPATA21	909.779	678.68	652.877	676.362	543.665	525.585	977.829	777.649	868.965	908.443	997.991	763.057
COL4A1	6.28053	43.6622	14.1208	15.3416	22.9718	28.9313	14.9287	11.6564	10.903	3.35631	3.16154	3.26558
PLEKHN1	204.566	161.627	221.779	154.083	150.593	141.901	524.163	281.419	298.741	237.18	160.184	153.482
TUBB4B	4.48609	14.5541	4.9838	7.33726	10.2097	9.64376	7.46435	25.8106	6.54177	7.8314	10.5385	3.26558
C19orf54	75.3663	36.7682	40.701	45.3576	48.4959	42.7081	69.6672	75.7667	73.0498	89.5017	93.7922	65.3116
RPL14	15.2527	72.7704	34.0559	48.6927	75.7217	36.5085	25.7105	41.63	28.3477	11.1877	17.9154	16.3279
NDUFA4	14.3555	50.5563	6.64506	30.6831	47.6451	20.6652	16.5874	43.2952	11.9932	2.23754	9.48461	3.26558
S100A13	2283.42	1786.32	1162.89	1049.9	1014.16	1266.09	2596.76	2302.14	1093.57	3262.34	2965.52	1080.91
MYBPC1	165.088	342.404	307.334	938.503	1838.59	896.869	248.812	592.812	1121.91	353.532	272.946	253.627
TUBB	19.7388	42.8962	10.7982	19.3437	22.1209	16.5322	11.6112	35.8018	22.8962	10.0689	24.2384	9.79674
XRCC6	7.17774	25.2781	7.4757	16.6756	42.5403	7.57724	10.7818	10.8238	3.27089	5.59386	4.21538	1.08853
NACA	17.9444	73.5364	13.2901	46.6917	44.2419	36.5085	40.6392	43.2952	46.8827	10.0689	5.26923	5.44263
TRAPPC4	255.707	266.569	129.579	130.737	158.25	141.212	229.736	218.974	208.246	257.317	271.892	182.872
IGF2R	10.7666	19.1501	9.13696	12.0064	47.6451	12.3991	17.4168	11.6564	15.2641	5.59386	2.10769	5.44263
DYNC1H1	9.8694	36.0022	12.4595	22.6788	51.0483	12.3991	9.95246	18.3172	13.0835	4.47509	4.21538	8.70821
SVIL	36.7859	80.4304	34.8866	144.744	186.326	112.97	40.6392	74.1015	83.9527	48.1072	28.4538	43.541
TOPORS	54.7303	42.1302	24.919	40.6885	34.0322	35.8197	45.6155	62.4451	59.9662	73.8389	91.6845	53.3378
CDC42SE1	64.5997	90.3885	88.0471	179.429	91.887	71.6393	172.509	21.6476	151.551	231.586	589.099	401.666
EME2	894.526	478.753	459.34	429.563	375.205	580.692	730.677	731.856	623.649	995.707	723.992	784.827
NRAP	39.4776	94.9845	73.9263	254.803	342.024	179.787	123.576	95.7491	233.323	23.4942	83.2538	43.541
RPS4X	9.8694	88.0905	9.96759	39.3544	55.3024	39.2639	18.2462	46.6257	6.54177	1.11877	7.37692	6.53116
SZT2	204.566	133.285	142.869	92.7163	104.649	141.212	262.911	160.692	148.28	245.011	164.4	212.263
RPL23A	11.6638	85.7924	18.2739	53.3619	91.887	39.2639	32.3455	57.4495	21.8059	3.35631	16.8615	3.26558
CALM1	3.58887	24.5121	4.9838	38.0204	43.3911	30.309	9.95246	21.6476	15.2641	5.59386	3.16154	3.26558
RPL10A	20.636	85.0264	10.7982	44.0236	51.0483	24.7982	25.7105	51.6213	15.2641	3.35631	9.48461	9.79674
MT-ND2	307.746	624.293	336.406	621.666	790.398	373.351	441.226	547.019	279.116	149.915	208.661	193.758
RCSD1	3.58887	15.3201	5.81443	24.0129	29.7782	12.3991	3.31749	4.99561	14.1738	12.3065	8.43076	8.70821
MT-CO1	713.288	2060.55	606.362	1903.69	2339.72	888.603	1016.81	1505.34	886.41	338.988	415.215	529.024
DUSP27	3.58887	22.9801	12.4595	34.6852	32.3306	24.1094	15.7581	18.3172	15.2641	5.59386	5.26923	14.1508
MT-ND1	270.96	787.452	312.318	496.266	690.003	339.598	398.098	580.323	246.407	97.3331	179.154	185.049
SPOUT1	729.438	448.112	456.848	350.855	389.669	396.772	520.846	625.283	623.649	615.324	647.061	579.096
TCEA3	21.5332	64.3443	19.9352	60.6992	76.5725	40.6416	40.6392	46.6257	49.0633	16.7816	22.1307	15.2394
COL15A1	6.28053	39.8322	13.2901	12.6735	24.6734	15.1545	5.8056	15.8194	8.72236	2.23754	4.21538	4.3541
GPANK1	118.433	89.6225	65.62	64.7013	63.8104	66.8175	128.553	109.071	126.474	127.54	129.623	118.649
APOM	201.874	87.3245	101.337	86.7131	91.887	119.858	213.149	153.199	221.33	203.616	179.154	166.545
HLA-E	12.5611	38.3002	21.5965	19.3437	30.629	26.1759	20.7343	39.1322	13.0835	4.47509	9.48461	6.53116
ZNRD1ASP	62.8053	42.8962	53.9911	50.0268	20.4193	50.9741	77.1316	85.7579	51.2439	70.4826	83.2538	105.587
RACK1	17.0471	90.3885	15.782	54.0289	53.6008	27.5536	31.5161	56.6169	31.6186	4.47509	17.9154	4.3541
AC004980.1	115.741	30.6402	58.9749	22.6788	43.3911	19.2875	82.1078	17.4846	184.26	97.3331	183.369	79.4624
TMSB4X	8.97218	60.5143	22.4271	22.0118	44.2419	24.1094	11.6112	29.9736	9.81266	2.23754	5.26923	7.61968
H1FX-AS1	481.806	232.099	255.004	185.433	273.959	223.873	394.781	324.714	356.527	633.225	397.3	471.332
MT-RNR2	330.176	639.613	229.255	784.42	1221.76	639.932	703.307	772.654	672.712	163.341	386.761	141.508
MT-RNR1	43.9637	126.391	34.0559	155.417	211.851	92.3045	105.33	138.212	160.273	22.3754	54.7999	20.682
MXD3	232.379	156.265	173.602	110.059	113.157	143.279	142.652	164.855	163.544	165.578	279.269	236.21
VDAC1	16.1499	45.1942	10.7982	46.6917	49.3467	33.7532	18.2462	48.2909	39.2506	8.95017	15.8077	16.3279
ATP6V1G2	45.7581	20.6821	28.2415	20.0107	17.0161	30.9978	54.7385	39.9648	47.973	63.77	46.3692	46.8066
PPM1N	1195.09	815.794	514.992	657.686	604.923	515.252	922.261	921.689	1088.11	1221.7	1285.69	1027.57
MYL5	1411.32	1018.02	1148.77	817.771	791.249	861.739	1322.85	1508.67	995.44	1342.53	1736.74	1275.75
AL109955.1	441.431	291.082	323.947	300.828	311.395	292.757	427.956	423.794	575.676	577.286	624.93	403.843
MIF-AS1	569.734	319.424	360.495	295.492	268.855	307.911	339.213	628.614	494.994	426.252	800.922	792.447
MIR1282	2914.16	1937.99	1485.17	1515.48	1240.47	1102.83	1976.39	2450.34	2651.6	2306.91	4226.97	3226.39
PPP3CB-AS1	90.619	176.947	337.237	176.761	177.818	203.897	240.518	124.058	67.5983	86.1454	88.523	77.2854
AP4M1	207.257	180.777	110.474	125.401	116.56	147.412	172.509	179.842	188.621	251.724	199.177	216.617
C19orf73	57.422	21.4481	23.2577	18.6767	25.5242	23.4206	69.6672	32.4714	58.8759	54.8198	46.3692	56.6034
APOL6	98.694	79.6644	69.7732	77.3748	45.9435	35.1308	106.989	143.207	102.488	149.915	96.9537	71.8427
AL357140.1	104.077	62.0463	86.3858	72.7056	57.004	83.3496	83.7666	88.2557	87.2236	114.115	125.408	108.853
SLC25A34-AS1	189.313	62.8123	24.0884	66.7024	37.4355	79.9054	55.5679	144.873	106.849	243.892	84.3076	35.9214
SVIL-AS1	489.881	576.801	1029.98	1132.61	1148.59	1210.98	532.457	483.741	1133.91	722.726	559.592	1161.46
AL391244.1	194.696	160.861	149.514	118.73	101.246	113.659	209.831	147.37	153.732	201.379	229.738	194.846
AL162586.1	337.354	196.097	196.86	146.745	162.504	141.212	219.784	206.485	298.741	296.474	228.684	267.777
RUSC1-AS1	345.429	264.271	308.995	217.45	188.028	208.03	258.764	296.406	243.136	291.999	362.523	268.866
AL354836.1	501.545	285.719	220.948	246.799	206.746	334.776	528.31	423.794	454.653	510.16	605.961	478.952
MRPL23-AS1	17.9444	30.6402	53.9911	41.3555	14.4637	4.13304	38.1511	9.99121	8.72236	12.3065	25.2923	20.682
AL049569.1	24.2249	13.7881	15.782	10.6724	7.65725	15.8433	14.0993	14.9868	19.6253	30.2068	27.4	22.8591
AL161452.1	259.296	138.647	139.546	135.406	128.472	128.124	240.518	225.635	196.253	249.486	216.038	234.033
LINC01709	169.574	96.5165	58.1443	53.3619	38.2863	85.4161	63.0323	39.1322	37.07	0	1.05385	1.08853
SRRM5	124.713	85.7924	115.458	77.3748	63.8104	59.2402	115.283	109.903	83.9527	116.352	167.561	94.7018
CACTIN-AS1	125.611	69.7064	68.9425	54.696	57.004	59.9291	112.795	77.4319	105.759	118.59	111.708	97.9674
CEP164P1	27.8138	34.4702	76.4182	46.6917	91.0362	76.4612	13.2699	18.3172	27.2574	29.0881	34.7769	47.8952
C6orf47-AS1	74.4691	41.3642	52.3299	31.3501	32.3306	42.7081	93.719	62.4451	66.508	59.2949	87.4691	52.2493
AC004771.1	1297.38	853.328	679.458	760.407	693.407	682.64	1657.91	950.83	1227.67	1565.16	1536.51	1521.76
AL121987.2	128.302	72.7704	104.66	56.03	57.8548	69.5728	77.961	74.9341	126.474	82.7891	299.292	165.456
RASA4CP	64.5997	46.7262	20.7658	34.6852	23.8226	25.4871	38.9805	44.1278	56.6954	87.2642	50.5846	56.6034
RPL41	38.5804	88.0905	39.0397	56.03	53.6008	43.3969	61.3735	86.5905	30.5283	20.1379	32.6692	28.3017
VIM-AS1	973.482	908.481	2226.1	633.006	992.89	737.747	309.356	528.702	498.265	644.412	507.953	2215.15
SZT2-AS1	44.8609	28.3421	44.8542	30.0161	17.8669	26.8648	38.1511	26.6432	35.9797	35.8007	36.8846	28.3017
AL162231.2	60.1136	26.0441	28.2415	30.6831	30.629	26.1759	47.2742	41.63	46.8827	70.4826	71.6615	64.223
AP000688.1	149.835	42.8962	90.539	65.3683	42.5403	68.884	77.1316	64.9429	141.738	128.659	185.477	150.217
HHATL-AS1	155.219	85.0264	96.3534	90.0482	94.4394	97.8153	183.291	150.701	152.641	192.429	204.446	162.19
AC007383.3	39.4776	50.5563	117.119	80.0429	127.621	108.837	20.7343	79.0971	50.1536	38.0382	34.7769	35.9214
AC079742.1	235.071	161.627	165.296	122.065	134.427	141.901	231.395	192.331	227.872	255.08	301.4	205.731
AC135050.1	63.7025	39.8322	49.0073	36.6863	36.5846	26.8648	54.7385	54.9517	54.5148	58.1761	96.9537	69.6657
RPS28	480.909	338.574	267.464	276.148	269.705	287.935	460.301	447.939	459.014	502.328	582.776	428.879
AC053503.4	50776.3	27887.9	25173.2	20566.3	23980	26489.3	45773	36416.3	56051	55026.8	48193.4	48536.3
NUCB1-AS1	523.975	255.845	325.608	278.816	242.48	221.806	347.507	327.212	393.597	482.191	396.246	420.171
BX284668.4	56.5247	22.9801	32.3947	26.681	41.6895	48.9076	51.4211	41.63	31.6186	68.2451	99.0614	72.9313
LINC00957	381.318	185.373	215.965	173.426	141.234	219.051	520.846	301.402	295.47	403.877	305.615	371.187
GNAS-AS1	66.3941	96.5165	87.2165	83.378	60.4072	109.526	33.1749	43.2952	85.043	98.4519	37.9384	200.289
GSN-AS1	114.844	52.8543	107.982	90.0482	51.0483	52.3518	72.9847	99.9121	49.0633	138.728	175.992	166.545
TMEM147-AS1	159.705	88.0905	83.8939	75.3737	62.9596	80.5943	118.6	164.022	136.287	137.609	179.154	164.367
AL391650.1	296.979	161.627	195.199	111.393	110.605	203.897	415.515	253.943	379.423	334.513	726.099	375.542
PRMT5-AS1	428.87	318.658	295.705	280.817	239.927	262.448	432.103	343.864	454.653	496.735	389.923	399.489
TTN-AS1	8019.34	8020.83	24332.6	21836.4	34515.5	30608.6	18524.8	17885.9	31402.7	25645.6	33228.8	23663.5
AL450998.3	553.584	258.143	207.658	255.47	222.911	194.942	448.69	378.833	487.362	582.88	500.576	501.811
AC009133.1	1388	801.24	696.07	716.384	587.056	772.878	1060.77	968.315	1427.2	1514.82	1367.89	1431.41
MAP3K20-AS1	42.1693	15.3201	53.9911	75.3737	191.431	158.433	44.7861	83.2601	110.12	104.046	157.023	119.738
ALG1L6P	7.17774	13.0221	16.6127	11.3394	5.10483	11.7103	8.29372	8.32601	8.72236	11.1877	9.48461	6.53116
KLHL41	6.28053	48.2583	11.6289	64.7013	136.129	53.0407	19.0756	59.9473	27.2574	4.47509	11.5923	2.17705
AC005586.1	124.713	70.4724	85.5552	56.03	37.4355	88.1715	150.946	100.745	99.2169	148.797	100.115	201.377
AQP1	5.38331	22.9801	1.66127	12.6735	13.6129	6.19956	14.9287	17.4846	8.72236	1.11877	2.10769	0
NDUFB2-AS1	1032.7	759.876	626.297	436.234	460.286	453.257	754.728	879.227	726.137	719.37	1202.44	837.077
FLNC-AS1	2871.1	1608.61	3511.09	1544.83	1715.22	2790.49	4033.24	2355.43	3820.39	2699.6	5900.48	3569.28
TICAM2	51.1414	21.4481	19.9352	20.0107	21.2701	27.5536	38.9805	44.1278	23.9865	58.1761	44.2615	63.1345
AC010973.2	160.602	132.519	154.498	100.054	89.3346	88.1715	100.354	121.56	141.738	129.778	178.1	175.253
P2RY11	365.168	253.547	190.215	200.107	154.847	176.343	332.578	308.062	270.393	346.819	361.469	324.381
AC134772.1	240.454	233.631	208.489	198.773	192.282	208.718	240.518	243.952	267.122	284.168	424.7	296.079
HBB	11.6638	91.9205	8.30633	50.0268	164.205	21.354	38.1511	62.4451	32.7089	10.0689	4.21538	0
IGFBP7-AS1	589.472	425.132	451.034	196.105	248.435	349.931	388.146	440.446	307.463	402.758	500.576	992.736
A2M-AS1	59.2164	204.523	219.287	86.0461	143.786	168.077	68.8379	99.9121	175.538	105.165	49.5307	199.2
AP001107.1	834.413	450.41	429.437	445.572	353.084	395.394	811.955	675.239	878.778	893.899	982.184	787.004
NEAT1	8.97218	58.9823	17.4433	24.6799	52.75	29.6201	27.3693	34.9692	4.36118	4.47509	4.21538	1.08853
AP003352.1	4200.78	3719.72	4252.01	2693.44	2784.69	3338.81	4303.61	3869.93	4477.84	4978.53	6402.11	5500.32
LACTB2-AS1	3.58887	8.42604	11.6289	8.00429	20.4193	26.1759	3.31749	11.6564	14.1738	6.71263	8.43076	13.0623
AL049840.1	14.3555	13.7881	28.2415	28.682	25.5242	43.3969	19.0756	6.66081	8.72236	7.8314	5.26923	13.0623
AC008443.2	105.872	65.8763	69.7732	61.3662	48.4959	42.0192	129.382	50.7887	99.2169	90.6205	119.084	121.915
AC009060.1	207.257	155.499	355.511	292.156	296.08	342.353	91.2309	185.67	200.614	104.046	70.6076	72.9313
AC005329.1	969.893	650.337	647.894	496.266	475.6	555.894	733.994	1054.91	1092.48	957.668	902.091	709.719
ABHD14A	61.0108	29.1082	42.3623	25.3469	25.5242	39.2639	48.1036	36.6344	47.973	40.2758	57.9615	67.4886
ACTN3	16.1499	7.66004	4.9838	162.087	139.532	51.663	136.846	216.476	3.27089	1.11877	3.16154	1.08853
ATP5MF-PTCD1	50.2442	20.6821	23.2577	20.6777	20.4193	22.0429	34.8336	39.1322	39.2506	49.226	47.423	44.6296
CLMAT3	404.645	324.786	1198.6	282.818	319.052	317.555	134.358	162.357	189.711	200.26	299.292	547.529
AC011405.1	197.388	91.9205	91.3696	88.0472	66.3628	79.2166	142.652	125.723	130.835	154.39	169.669	109.941
AC012636.1	4152.33	1182.71	6243.04	1372.74	1092.43	683.329	602.953	1063.23	877.688	1077.38	2189.89	3633.5
AP002748.1	602.033	81.9624	49.0073	1760.28	1452.33	799.054	2092.51	2476.99	64.3274	89.5017	77.9845	56.6034
AC091180.3	788.655	625.825	568.984	453.576	446.673	413.993	664.327	740.182	906.035	703.707	941.084	632.434
AC106760.1	8.97218	5.36203	8.30633	16.6756	34.883	49.5965	0.829372	18.3172	9.81266	11.1877	4.21538	3.26558
CA3-AS1	5525.07	5182.02	19305.6	14802.6	9808.09	11218.4	4618.77	6791.53	16753.5	8197.24	10322.4	11527.5
AC108002.2	14.3555	3.83002	9.13696	6.67024	5.95564	6.19956	9.12309	15.8194	11.9932	10.0689	12.6461	34.8328
AC090197.1	42.1693	20.6821	48.1767	14.0075	16.1653	17.9098	9.95246	11.6564	13.0835	17.9003	79.0384	43.541
ALG1L13P	36.7859	71.2384	19.9352	30.0161	11.9113	17.9098	16.5874	35.8018	17.4447	39.157	10.5385	22.8591
AP001107.2	1203.17	782.09	663.676	623	616.834	577.937	1134.58	996.623	1225.49	1351.48	1364.73	1226.77
AP001107.4	64.5997	29.1082	34.8866	30.0161	26.375	26.1759	38.9805	46.6257	71.9595	55.9386	74.823	59.8689
AP003068.1	392.084	262.739	171.11	200.107	173.564	184.609	390.634	333.873	416.493	422.896	403.623	448.473
AC084125.1	141.76	52.8543	68.1119	67.3694	34.0322	58.5514	68.8379	82.4275	54.5148	108.521	105.385	132.8
AP003068.2	26.0193	11.4901	12.4595	11.3394	5.10483	8.95492	31.5161	24.978	21.8059	21.2567	22.1307	28.3017
AP000879.1	162.396	84.2604	83.0633	73.3726	84.2298	80.5943	111.965	117.397	66.508	146.559	157.023	134.977
AP001107.8	95.1051	48.2583	31.5641	40.6885	31.4798	45.4634	54.7385	65.7755	111.21	67.1263	122.246	94.7018
AP001267.1	998.604	775.962	956.889	618.998	724.036	783.211	915.626	1085.71	961.64	977.806	1178.2	1043.9
AC067930.5	174.958	53.6203	49.0073	55.363	39.9879	35.8197	128.553	93.2513	173.357	143.203	126.461	190.492
AP006621.1	631.642	322.488	303.181	299.494	219.508	333.398	395.61	487.904	553.87	637.7	539.569	653.116
AC084125.2	139.966	86.5585	106.321	58.6981	74.8709	86.105	137.676	171.516	98.1266	180.122	158.077	128.446
AC109322.1	37.6832	19.1501	25.7496	13.3405	16.1653	25.4871	39.8098	25.8106	45.7924	35.8007	51.6384	44.6296
RPS6KB2-AS1	191.107	132.519	101.337	105.39	80.8265	90.9269	171.68	127.388	175.538	195.785	201.284	156.748
AP000777.2	56.5247	38.3002	34.8866	42.0225	30.629	32.3755	68.8379	62.4451	68.6886	88.383	81.1461	48.9837
AP001453.1	237.763	127.923	141.208	95.3844	95.2902	107.459	179.974	173.181	182.079	152.153	263.461	161.102
AP001160.1	155.219	108.007	71.4344	78.0418	73.1693	105.392	159.239	168.185	147.19	172.291	185.477	127.358
AP000763.4	83.4413	52.8543	61.4668	43.3566	61.258	44.0857	371.559	108.238	61.0565	116.352	82.1999	129.535
AC089999.1	116.638	66.6423	43.1929	58.6981	41.6895	40.6416	68.8379	83.2601	82.8624	106.283	120.138	104.499
AC023055.1	53.8331	35.2362	25.7496	22.0118	24.6734	13.088	42.298	39.1322	31.6186	33.5631	75.8768	48.9837
AC073611.1	84.3385	43.6622	47.3461	44.6906	43.3911	39.2639	66.3497	64.1103	76.3207	95.0956	71.6615	87.0821
AC073957.2	90.619	65.1103	98.0147	44.6906	50.1975	61.9956	73.8141	84.9253	47.973	114.115	72.7153	108.853
AC025259.1	206.36	138.647	154.498	114.061	98.6935	108.148	135.188	187.335	198.434	251.724	298.238	225.325
AC034102.5	2573.22	769.068	1841.51	987.862	565.786	1494.78	1954	925.02	2070.47	1658.02	5394.63	1578.36
DDN-AS1	145.349	117.965	107.982	190.769	62.9596	66.1286	200.708	207.318	188.621	185.716	838.861	696.657
P2RX5-TAX1BP3	828.132	423.6	441.897	345.518	297.782	376.795	664.327	629.446	485.181	774.19	1070.71	735.844
AC125611.3	255.707	206.055	179.417	101.388	135.278	161.189	200.708	155.696	290.019	174.528	348.823	296.079
AC011603.3	261.988	200.693	167.788	424.227	62.9596	15.8433	417.174	476.248	466.646	350.176	2646.2	1250.72
C17orf49	11.6638	10.7241	29.9028	4.00214	5.95564	11.0214	3.31749	5.82821	10.903	15.6628	26.3461	19.5935
PPT2-EGFL8	588.575	352.362	390.397	294.825	311.395	326.51	481.865	467.922	611.656	600.78	734.53	455.004
AL583722.2	404.645	347	391.228	259.472	221.209	275.536	375.705	324.714	378.332	412.827	628.092	538.82
AL117190.2	67.2914	87.3245	186.062	90.7153	66.3628	171.521	32.3455	23.3128	17.4447	58.1761	124.354	50.0722
LRP1-AS	17.0471	6.12803	29.0722	20.0107	14.4637	27.5536	8.29372	13.3216	3.27089	11.1877	1.05385	13.0623
CSPG4P12	11.6638	6.89404	1.66127	8.00429	7.65725	24.7982	2.48812	15.8194	6.54177	10.0689	26.3461	7.61968
AL136295.2	77.1608	41.3642	34.0559	45.3576	37.4355	39.9527	63.8616	63.2777	55.6051	70.4826	111.708	63.1345
AC073167.1	2.69165	1.53201	3.32253	34.0182	55.3024	24.7982	4.14686	12.489	39.2506	17.9003	8.43076	18.5049
AC074212.1	349.018	204.523	243.375	172.092	119.964	192.186	291.939	240.622	358.707	333.394	797.761	383.161
IQCH-AS1	207.257	225.971	148.683	148.746	112.306	130.88	209.831	212.313	186.44	270.743	242.384	208.997
CRTC3-AS1	8.07496	6.89404	12.4595	7.33726	5.95564	12.3991	11.6112	14.9868	7.63207	6.71263	9.48461	11.9738
AC138028.3	53.8331	47.4922	41.5316	21.3448	19.5685	39.9527	31.5161	55.7843	15.2641	66.0075	52.6923	82.728
AC009133.2	421.693	206.055	210.15	181.431	165.907	224.562	313.503	301.402	415.403	416.183	361.469	522.493
NORAD	0.897218	18.3841	7.4757	18.6767	40.8387	18.5987	9.95246	14.1542	5.45148	2.23754	4.21538	4.3541
MIR762HG	163.294	125.625	124.595	88.0472	63.8104	75.0835	105.33	97.4143	112.3	104.046	147.538	186.138
AC005606.1	82.5441	55.1523	56.483	44.0236	52.75	68.884	92.8896	90.7535	71.9595	89.5017	108.546	93.6133
AC105020.2	199.182	138.647	81.402	80.7099	95.2902	92.3045	150.116	151.533	139.558	193.547	191.8	191.581
AC000032.1	30.5054	159.329	121.272	28.682	63.8104	16.5322	154.263	152.366	70.8692	440.796	173.884	38.0984
AC020978.2	148.938	88.0905	71.4344	74.0397	68.0645	76.4612	128.553	125.723	102.488	156.628	165.454	130.623
AC105020.4	213.538	108.007	92.2003	80.7099	52.75	112.97	620.37	114.899	64.3274	179.003	366.738	314.584
AL031600.3	164.191	130.221	120.442	110.059	105.5	121.236	195.732	125.723	146.1	167.816	201.284	164.367
Z92544.2	95.1051	36.7682	44.8542	44.0236	52.75	42.0192	66.3497	87.4231	73.0498	100.689	89.5768	89.2591
AC005606.2	187.519	101.879	87.2165	75.3737	83.379	93.6822	164.216	149.868	208.246	215.923	168.615	185.049
AC127496.1	10.7666	7.66004	6.64506	3.33512	5.95564	9.64376	22.393	9.15861	13.0835	29.0881	30.5615	20.682
MMP25-AS1	8.07496	7.66004	39.0397	28.682	74.0201	77.8389	10.7818	20.815	6.54177	20.1379	1.05385	5.44263
AC139530.1	157.91	112.603	102.998	81.3769	79.1249	103.326	147.628	107.406	140.648	166.697	152.808	174.164
ENSG00000262222	438.74	229.035	201.013	203.442	147.189	179.787	332.578	286.415	274.754	365.838	361.469	383.161
AC145207.2	409.131	357.724	357.172	222.786	231.419	292.757	383.999	334.706	317.276	313.256	453.153	433.233
AC090617.3	321.204	160.861	159.482	143.41	142.935	139.146	305.209	232.296	220.24	272.98	309.83	191.581
AC145207.3	1488.48	980.485	1045.77	705.044	709.572	794.232	1098.92	1028.26	1162.25	1248.55	1294.12	1295.35
ZNF213-AS1	42.1693	19.1501	29.0722	15.3416	20.4193	30.309	43.1273	20.815	17.4447	54.8198	43.2076	32.6558
LRRC37A17P	3.58887	6.89404	19.1046	17.3426	21.2701	17.9098	5.8056	10.8238	5.45148	19.0191	4.21538	8.70821
AC127496.6	261.09	145.541	128.748	134.739	102.947	127.435	263.74	214.811	204.976	250.605	268.73	220.971
AC145207.4	37.6832	28.3421	78.0795	25.3469	21.2701	32.3755	24.8812	38.2996	20.7156	35.8007	90.6307	70.7542
AP003396.5	410.926	337.042	440.235	189.435	228.867	135.013	93.719	120.727	117.752	164.459	347.769	452.827
AC100786.2	44.8609	29.8742	25.7496	32.6842	17.8669	24.7982	44.7861	25.8106	44.7021	60.4137	43.2076	64.223
TSPOAP1-AS1	305.951	177.713	218.456	160.753	161.653	182.543	264.57	264.767	204.976	336.75	378.33	286.282
AC132938.3	9.8694	9.95805	10.7982	8.67131	5.95564	7.57724	19.9049	21.6476	13.0835	16.7816	16.8615	17.4164
TXNIP	20.636	216.013	32.3947	157.418	287.572	107.459	56.3973	144.04	65.4177	41.3945	5.26923	7.61968
AC004408.1	598.444	534.671	383.752	418.891	410.088	458.767	640.275	567.834	577.856	629.868	1243.54	620.46
AC005775.1	34.9915	17.6181	16.6127	17.3426	12.7621	15.8433	44.7861	36.6344	30.5283	27.9693	40.0461	80.5509
AC011511.2	138.172	81.1964	115.458	61.3662	57.004	70.9505	103.671	124.058	117.752	138.728	133.838	107.764
LRRC37A16P	54.7303	98.0485	175.264	128.736	144.637	188.053	53.9092	69.9385	102.488	98.4519	73.7692	83.8165
UXT-AS1	183.93	108.007	104.66	92.0493	78.2741	80.5943	154.263	134.049	113.391	152.153	230.792	139.331
AC011511.3	97.7968	62.8123	63.9587	44.6906	34.883	50.9741	80.4491	80.7623	77.411	106.283	103.277	68.5772
AC016588.1	28.711	32.9382	29.9028	20.0107	13.6129	22.0429	34.8336	51.6213	30.5283	43.6321	52.6923	43.541
AC002398.2	20227.8	8963.78	9834.69	9248.95	5932.67	8155.86	15202.4	12043.6	25172.7	16733.5	19642.6	15581.2
GEMIN7-AS1	102.283	52.0883	55.6524	30.6831	29.7782	35.8197	75.4728	56.6169	58.8759	72.7202	110.654	57.6919
AC011447.3	12.5611	40.5982	14.1208	10.0054	11.0605	13.088	21.5637	19.9824	16.3544	24.613	36.8846	27.2132
DM1-AS	1066.79	530.075	737.602	558.966	397.326	451.879	927.238	833.434	1443.55	967.737	3186.83	1509.79
AC005944.1	3628.35	3381.14	2449.54	1803.63	1910.91	1829.56	2785.86	2914.94	3306.87	3787.04	2868.57	2621.17
AC027319.1	351.71	193.033	231.747	164.755	186.326	145.345	257.935	409.64	185.35	297.593	907.361	174.164
AC011446.1	87.0302	48.2583	41.5316	46.6917	39.1371	55.796	83.7666	91.5861	117.752	54.8198	133.838	103.41
AC008738.3	113.947	79.6644	91.3696	56.697	58.7056	79.2166	91.2309	117.397	115.571	97.3331	118.031	144.774
AC011498.6	217.127	95.7505	75.5876	106.057	88.4838	109.526	243.835	143.207	281.296	251.724	214.984	192.669
AC008655.1	411.823	317.892	200.183	264.141	217.806	259.693	519.187	371.34	559.321	596.305	370.953	459.358
ENSG00000267896	373.243	285.719	200.183	184.766	145.488	214.229	347.507	362.181	367.43	447.509	397.3	372.276
AC139769.2	154.322	104.177	63.1281	66.7024	39.9879	91.6157	45.6155	50.7887	55.6051	1.11877	2.10769	1.08853
AC010320.2	302.363	219.843	177.755	166.089	184.625	169.455	257.105	305.565	258.4	268.505	305.615	249.273
AC018766.1	191.107	78.8984	88.0471	96.7185	78.2741	118.48	165.874	169.851	157.003	228.229	172.831	173.076
NAPA-AS1	301.465	178.479	161.143	164.088	123.367	141.901	281.157	241.454	207.156	253.961	406.784	239.476
AC053503.5	24.2249	19.9161	23.2577	21.3448	17.0161	16.5322	57.2267	29.9736	30.5283	43.6321	95.8999	54.4263
AC020909.3	296.082	153.201	184.401	132.738	134.427	136.39	209.831	237.291	192.982	203.616	302.454	292.814
AC005253.2	352.607	201.459	194.368	154.75	116.56	177.721	270.375	169.018	197.343	258.436	345.661	215.528
AC007193.3	38.5804	31.4062	29.9028	27.348	26.375	24.1094	40.6392	36.6344	41.4312	63.77	48.4769	43.541
AP001160.3	79.8524	57.4503	48.1767	45.3576	23.8226	37.1974	76.3022	54.9517	58.8759	88.383	90.6307	75.1083
AC006942.1	80.7496	39.0662	30.7334	24.0129	27.2258	38.575	44.7861	64.9429	37.07	63.77	61.123	63.1345
AC093503.2	936.696	598.249	617.991	573.641	501.125	466.345	902.357	681.9	909.306	1021.44	1168.71	1078.73
PTOV1-AS2	417.206	255.845	223.44	252.135	165.056	249.36	359.118	391.322	418.673	504.566	444.723	367.922
AC008878.4	467.451	198.395	166.127	135.406	129.322	193.564	379.852	290.578	450.292	434.083	475.284	691.214
AC008635.1	80.7496	44.4282	49.0073	35.3523	45.0927	37.1974	90.4015	53.2865	64.3274	77.1952	92.7384	78.3739
U47924.1	41.272	22.2141	24.0884	20.0107	12.7621	22.0429	34.0042	37.467	43.6118	43.6321	36.8846	41.364
AL691432.2	24.2249	13.0221	10.7982	10.0054	3.40322	15.1545	18.2462	13.3216	17.4447	24.613	21.0769	35.9214
U47924.2	736.616	483.349	548.218	297.493	326.709	335.465	527.48	587.816	563.683	586.236	864.153	892.591
AL353708.3	12.5611	9.95805	24.0884	20.6777	20.4193	26.8648	14.0993	14.1542	16.3544	10.0689	4.21538	9.79674
AL391121.1	32.2999	24.5121	31.5641	26.681	11.9113	28.9313	45.6155	43.2952	28.3477	25.7317	61.123	88.1706
AC083862.2	43.9637	54.3863	58.9749	41.3555	36.5846	50.9741	84.5959	63.2777	59.9662	62.6512	93.7922	70.7542
AL022328.4	36.7859	29.1082	36.5478	18.6767	27.2258	35.1308	58.8854	42.4626	39.2506	66.0075	45.3153	45.7181
AL121928.1	280.829	151.669	165.296	147.412	107.202	132.257	286.133	193.996	271.484	288.643	347.769	251.45
RF02195	36.7859	31.4062	24.919	20.0107	16.1653	13.088	24.8812	27.4758	28.3477	30.2068	41.1	50.0722
AC004528.2	288.904	181.543	215.965	140.742	128.472	209.407	279.498	193.163	186.44	222.636	300.346	312.407
RF01972.1	2688.07	780.558	1878.06	707.712	705.318	987.107	1782.32	937.509	1178.61	1279.87	5073.21	3618.26
AC105020.6	266.474	134.817	112.135	90.0482	91.887	135.013	176.656	189.833	163.544	252.842	214.984	300.433
PIP4K2B	5.38331	33.7042	4.9838	24.0129	22.9718	9.64376	15.7581	14.1542	16.3544	4.47509	2.10769	5.44263
CSPG4P10	113.049	50.5563	37.3785	62.7003	76.5725	131.568	103.671	114.899	53.4245	106.283	88.523	67.4886
AC026471.5	4417	3396.46	2683.77	2466.65	2309.09	2756.05	3930.39	3636.8	4023.19	4880.08	4703.31	3574.72
TSC22D1-AS1	65.4969	40.5982	80.5714	114.728	129.322	92.9934	59.7148	49.9561	131.926	76.0765	50.5846	91.4362
AC120114.3	93.3107	55.1523	68.9425	38.6874	37.4355	39.9527	63.0323	56.6169	76.3207	78.314	60.0692	120.826
AC002310.6	78.9552	41.3642	42.3623	42.6895	31.4798	37.8862	80.4491	69.9385	55.6051	61.5324	79.0384	67.4886
AC005943.2	325.69	225.971	179.417	180.096	121.665	148.101	293.598	180.674	347.804	205.854	320.369	423.437
AC022211.4	73.5719	60.5143	54.8218	45.3576	55.3024	59.2402	104.501	75.7667	66.508	92.858	105.385	99.0559
AC129492.7	118.433	57.4503	50.6686	37.3533	43.3911	68.884	86.2547	90.7535	88.3139	95.0956	100.115	109.941
AC112497.1	59.2164	44.4282	44.8542	30.6831	35.7338	27.5536	52.2504	51.6213	55.6051	58.1761	59.0153	54.4263
AC087164.2	130.994	92.6865	73.9263	67.3694	78.2741	78.5277	112.795	153.199	114.481	154.39	149.646	105.587
KLHL30-AS1	61.0108	90.3885	62.2975	40.6885	35.7338	68.884	187.438	70.7711	95.946	106.283	123.3	76.1968
AD001527.2	130.097	55.9183	48.1767	45.3576	54.4516	57.1737	95.3778	84.9253	106.849	140.965	154.915	87.0821
AC020763.4	1254.31	651.103	615.499	759.74	630.447	830.741	1308.75	935.011	1737.93	1600.96	1552.31	1682.86
AC067930.6	1654.47	1228.67	1008.39	761.741	818.475	971.953	1400.81	1121.51	1392.31	1669.21	1653.48	1851.58
AC020907.5	1113.45	776.728	730.957	631.672	648.314	633.044	1273.09	1022.43	1170.98	1244.07	1260.4	1202.82
AC120057.3	1409.53	969.761	1011.71	755.738	703.616	723.282	1380.9	1094.04	1280.01	1402.94	1623.98	1209.35
AC013489.3	233.277	142.477	144.53	131.404	100.395	121.236	162.557	229.798	204.976	201.379	327.746	220.971
AC135050.7	113.049	58.9823	78.0795	31.3501	62.9596	48.2188	40.6392	54.9517	47.973	70.4826	83.2538	149.128
ENSG00000280178	9.8694	16.0861	11.6289	7.33726	6.80645	8.95492	4.97623	9.99121	13.0835	7.8314	87.4691	19.5935
AC245140.2	5620.17	3041.8	3500.29	1984.4	2320.15	2883.48	4131.93	3461.12	3449.69	4520.96	4355.54	4818.91
AC106886.4	205.463	141.711	148.683	106.724	80.8265	119.169	168.362	143.207	141.738	187.954	166.508	198.112
AC005329.3	1084.74	672.552	651.216	504.27	518.991	546.25	785.415	1207.27	1094.66	933.056	828.322	732.578
CTBP1-AS	584.089	461.134	431.098	363.528	293.528	369.907	411.368	492.067	433.938	517.991	559.592	460.447
ENSG00000281206	4085.03	2161.66	2475.29	1569.51	2083.62	1818.54	2283.26	2308.8	1888.39	3020.68	3000.3	4411.8
ENSG00000281275	228.791	134.051	122.934	110.059	109.754	130.88	174.168	162.357	240.955	199.141	181.261	227.502
ENSG00000281457	229.688	117.965	137.885	83.378	97.8427	115.036	199.879	116.564	151.551	144.322	192.854	219.882
AC008537.4	48.4498	35.2362	30.7334	20.0107	22.1209	28.9313	35.663	40.7974	22.8962	38.0382	61.123	40.2755
