# Supplementary material for: Transcriptomic Profiling of Rectus Abdominis Muscle in Women with Gestational Diabetes-Induced Myopathy: Characterization of Pathophysiology and Potential Muscle Biomarkers of Pregnancy-Specific Urinary Incontinence
Source: Int J Mol Sci. 2022 Oct 25;23(21):12864. doi: 10.3390/ijms232112864 (PMC9658972; doi:10.3390/ijms232112864)
Supplement: Supplementary file 1 [file ijms-23-12864-s001.zip › Table S2. List of differentially expressed genes in NG-C, NG-I and GDM-C women when compared with GDM-I women.xlsx]

## Sheet: NG-C vs. GDM-I
Table S1. List of differentially expressed genes in NG-C, NG-I and GDM-C women when compared with GDM-I women. The genes were considered differentially expressed when log2 Fold Change ≥ |1.5| and the adjusted p-value (padj) ≤ 0.05. Purple color indicates genes with down-regulated transcription and orange color indicates genes with up-regulated transcription in GDM-I. The genes are identified by t…
Gene symbol	Gene name	baseMean	log2FoldChange	lfcSE	stat	pvalue	padj
SKP1	S-phase kinase associated protein 1	8.86951	5.69366	1.43409	3.97023	7.18031e-05	0.0136653			Down regulation in GDM-I
DCN	decorin	25.4775	4.27692	1.06959	3.99866	6.37015e-05	0.0127969			Up regulation in GDM-I
EEF1A1	eukaryotic translation elongation factor 1 alpha 1	29.2866	3.98763	0.914662	4.35967	1.30258e-05	0.00588767
EIF1	eukaryotic translation initiation factor 1	48.0787	3.82257	0.891362	4.28845	1.79921e-05	0.00722882
RPS13	ribosomal protein S13	22.6184	3.72423	1.04182	3.57472	0.000350603	0.0352162
SERPING1	serpin family G member 1	9.65148	3.68554	1.02354	3.60079	0.000317255	0.033741
PDLIM5	PDZ and LIM domain 5	21.1436	3.52725	1.00936	3.49453	0.000474897	0.0424554
FHL1	four and a half LIM domains 1	466.832	3.26152	0.800029	4.07675	4.56687e-05	0.0106764
ATP5F1A	ATP synthase F1 subunit alpha	26.2723	3.24522	0.883296	3.67399	0.000238793	0.0311632
ATP2A2	ATPase sarcoplasmic/endoplasmic reticulum Ca2+ transporting 2	131.955	2.91088	0.71026	4.09833	4.16134e-05	0.0106764
COL3A1	collagen type III alpha 1 chain	86.2556	2.73283	0.64575	4.23203	2.31586e-05	0.00809151
RPL5	ribosomal protein L5	23.6588	2.68895	0.770179	3.49133	0.000480618	0.0424554
COL4A1	collagen type IV alpha 1 chain	16.1716	2.68509	0.765728	3.50659	0.000453893	0.0424554
VIM	vimentin	30.4158	2.58486	0.740455	3.49091	0.000481381	0.0424554
FLNA	filamin A	14.5245	2.49501	0.682883	3.65364	0.000258544	0.0311632
UBC	ubiquitin C	143.154	2.41588	0.602554	4.0094	6.08724e-05	0.0127969
RPL4	ribosomal protein L4	62.428	2.38523	0.628107	3.79749	0.000146171	0.022023
TPM3	tropomyosin 3	237.417	2.3623	0.521285	4.53168	5.85162e-06	0.00423189
G0S2	G0/G1 switch 2	41.7558	2.332	0.55413	4.2084	2.57191e-05	0.00809151
NACA	nascent polypeptide associated complex subunit alpha	34.8745	2.3119	0.643434	3.59307	0.000326806	0.0337637
RPS27	ribosomal protein S27	37.8669	2.21395	0.63633	3.47924	0.000502836	0.0432918
SERPINF1	serpin family F member 1	29.4279	2.03172	0.499331	4.06888	4.72406e-05	0.0106764
GSN	gelsolin	88.6321	1.97473	0.54012	3.6561	0.000256083	0.0311632
MYH7	myosin heavy chain 7	2939.26	1.86852	0.4115	4.54074	5.6056e-06	0.00423189
EPHX1	epoxide hydrolase 1	27.0731	1.85076	0.504928	3.66539	0.000246962	0.0311632
SPARC	secreted protein acidic and cysteine rich	71.9792	1.79106	0.497045	3.60341	0.000314072	0.033741

## Sheet: NG-I vs. GDM-I
Table S1. List of differentially expressed genes in NG-C, NG-I and GDM-C women when compared with GDM-I women. The genes were considered differentially expressed when log2 Fold Change ≥ |1.5| and the adjusted p-value (padj) ≤ 0.05. Purple color indicates genes with down-regulated transcription and orange color indicates genes with up-regulated transcription in GDM-I. The genes are identified by t…
Gene symbol	Gene name	baseMean	log2FoldChange	lfcSE	stat	pvalue	padj
SKP1	S-phase kinase associated protein 1	8.86951	6.2282	1.42621	4.36696	1.25987e-05	0.00129011			Down regulation in GDM-I
AMPD1	adenosine monophosphate deaminase 1	11.1093	5.97809	1.48513	4.02529	5.69062e-05	0.00303497			Up regulation in GDM-I
ACTN3	actinin alpha 3	67.0294	5.95209	1.08034	5.50944	3.59979e-08	3.25421e-05
PKIA	cAMP-dependent protein kinase inhibitor alpha	14.7167	5.38117	1.26593	4.25077	2.1304e-05	0.00167468
DCN	decorin	25.4775	5.20118	1.06434	4.88678	1.025e-06	0.000264743
EEF1A1	eukaryotic translation elongation factor 1 alpha 1	29.2866	4.90859	0.908692	5.40182	6.59676e-08	4.77077e-05
ZFAND5	zinc finger AN1-type containing 5	10.5136	4.84876	1.35762	3.57151	0.000354932	0.00725104
ACSL1	acyl-CoA synthetase long chain family member 1	13.676	4.49194	1.24651	3.6036	0.000313838	0.00696887
DUSP1	dual specificity phosphatase 1	20.4343	4.3943	1.22206	3.59582	0.000323376	0.00700196
COX7C	cytochrome c oxidase subunit 7C	12.238	4.39115	1.30941	3.35352	0.000797897	0.0108489
PDLIM5	PDZ and LIM domain 5	21.1436	4.28883	1.0027	4.2773	1.89177e-05	0.00155469
AMOTL1	angiomotin like 1	10.6507	4.2727	1.03957	4.11008	3.95521e-05	0.00245982
RPS13	ribosomal protein S13	22.6184	4.18391	1.03746	4.03284	5.51075e-05	0.00303497
FEZ2	fasciculation and elongation protein zeta 2	13.0593	4.15371	1.25366	3.31326	0.000922137	0.011741
EIF4G2	eukaryotic translation initiation factor 4 gamma 2	17.8856	4.1382	1.00767	4.1067	4.01354e-05	0.00245982
NR4A1	nuclear receptor subfamily 4 group A member 1	8.92189	4.13216	1.39796	2.95585	0.00311808	0.0252708
ITM2B	integral membrane protein 2B	9.43612	4.12491	1.08298	3.80886	0.000139609	0.00453654
S100A9	S100 calcium binding protein A9	14.5824	4.11607	1.06722	3.8568	0.000114883	0.00410779
HBB	hemoglobin subunit beta	44.6031	3.94364	0.979865	4.02468	5.70532e-05	0.00303497
DAPK2	death associated protein kinase 2	10.3065	3.92902	1.07921	3.64065	0.000271952	0.00651245
GHITM	growth hormone inducible transmembrane protein	9.68541	3.92176	1.15947	3.38237	0.000718645	0.0103531
EIF1	eukaryotic translation initiation factor 1	48.0787	3.87888	0.890315	4.35675	1.32008e-05	0.00129011
RPL6	ribosomal protein L6	17.2342	3.87461	0.977408	3.96417	7.36532e-05	0.00341449
FHL1	four and a half LIM domains 1	466.832	3.83382	0.799726	4.79392	1.63557e-06	0.000347894
USP22	ubiquitin specific peptidase 22	9.29107	3.76598	1.10086	3.42094	0.000624062	0.00961769
CFL2	cofilin 2	17.9236	3.76426	0.936903	4.01777	5.87521e-05	0.00303497
CAP2	cyclase associated actin cytoskeleton regulatory protein 2	11.8848	3.75863	1.15081	3.26607	0.00109052	0.0128447
UQCRFS1	ubiquinol-cytochrome c reductase, Rieske iron-sulfur polypeptide 1	10.1899	3.716	1.16413	3.19208	0.00141252	0.0154524
KLHL41	kelch like family member 41	39.9267	3.70472	0.779357	4.75357	1.99859e-06	0.000401496
ACTR1A	actin related protein 1A	8.74905	3.70202	1.28414	2.88288	0.00394054	0.0296854
PDE4DIP	phosphodiesterase 4D interacting protein	62.1864	3.66551	0.686528	5.3392	9.33571e-08	5.62632e-05
ATP5F1A	ATP synthase F1 subunit alpha	26.2723	3.65876	0.879523	4.15993	3.18342e-05	0.00213171
OPTN	optineurin	17.1225	3.6083	0.91691	3.93529	8.30975e-05	0.00361642
ATP2A2	ATPase sarcoplasmic/endoplasmic reticulum Ca2+ transporting 2	131.955	3.60253	0.708822	5.08241	3.72674e-07	0.000122508
MCL1	MCL1 apoptosis regulator, BCL2 family member	8.68145	3.58667	1.02786	3.48945	0.000484011	0.0082648
FKBP3	FKBP prolyl isomerase 3	9.0195	3.54067	1.12937	3.1351	0.00171797	0.017401
COX6C	cytochrome c oxidase subunit 6C	9.22881	3.53479	1.19609	2.95527	0.00312391	0.0252708
HNRNPK	heterogeneous nuclear ribonucleoprotein K	10.9522	3.52366	1.0229	3.44478	0.000571534	0.00922619
SERPING1	serpin family G member 1	9.65148	3.50223	1.02285	3.42398	0.000617115	0.0095772
FYCO1	FYVE and coiled-coil domain autophagy adaptor 1	22.8846	3.5014	0.836067	4.18795	2.81491e-05	0.0019676
PNRC1	proline rich nuclear receptor coactivator 1	10.3717	3.45927	0.945745	3.65772	0.00025447	0.00639655
HSPA9	heat shock protein family A (Hsp70) member 9	9.66348	3.43541	1.03411	3.32208	0.000893483	0.0114569
NEAT1	nuclear paraspeckle assembly transcript 1	24.2999	3.35903	0.867966	3.87	0.000108835	0.00409945
FBXO40	F-box protein 40	11.7999	3.34808	0.933984	3.58472	0.000337434	0.00705295
EIF4H	eukaryotic translation initiation factor 4H	10.7298	3.33098	0.867365	3.84035	0.00012286	0.00431321
VDAC2	voltage dependent anion channel 2	9.30151	3.31548	1.05438	3.14448	0.00166382	0.0172389
HADHB	hydroxyacyl-CoA dehydrogenase trifunctional multienzyme complex subunit beta	14.7423	3.30854	0.977392	3.38507	0.000711592	0.0103115
DDX17	DEAD-box helicase 17	9.24995	3.29923	0.990276	3.33163	0.000863405	0.0112305
CSDE1	cold shock domain containing E1	35.3593	3.26872	0.575512	5.67967	1.34953e-08	2.43995e-05
B2M	beta-2-microglobulin	23.9375	3.24772	0.816954	3.97541	7.02594e-05	0.00334981
TXNIP	thioredoxin interacting protein	103.017	3.2468	0.837948	3.8747	0.000106758	0.00409945
AQP1	aquaporin 1 (Colton blood group)	9.71104	3.23459	1.12759	2.86857	0.00412327	0.0304903
SBDS	SBDS ribosome maturation factor	8.93101	3.19707	1.02778	3.11065	0.00186678	0.0182454
DDIT4L	DNA damage inducible transcript 4 like	16.8388	3.18371	1.12261	2.83599	0.00456835	0.0326465
CNBP	CCHC-type zinc finger nucleic acid binding protein	38.1155	3.18093	0.798388	3.98419	6.77117e-05	0.00334981
SORBS1	sorbin and SH3 domain containing 1	9.58139	3.17377	0.950896	3.33767	0.000844851	0.0111119
MYPN	myopalladin	26.1837	3.16931	0.732932	4.32416	1.53117e-05	0.00136683
UQCRH	ubiquinol-cytochrome c reductase hinge protein	11.7619	3.16855	0.826657	3.83296	0.000126609	0.00434892
ARPC2	actin related protein 2/3 complex subunit 2	12.3624	3.16631	0.840967	3.76508	0.000166496	0.00505923
NIPSNAP2	nipsnap homolog 2	9.37812	3.15612	1.00642	3.136	0.00171269	0.017401
GYG1	glycogenin 1	14.0424	3.14956	1.05734	2.97875	0.00289424	0.0241142
PGK1	phosphoglycerate kinase 1	29.8155	3.14878	0.913007	3.4488	0.000563084	0.00920229
SLC25A4	solute carrier family 25 member 4	43.0944	3.14133	0.803056	3.91172	9.16423e-05	0.00376567
CALM1	calmodulin 1	18.3618	3.1333	0.731642	4.28256	1.84753e-05	0.00155365
MYL1	myosin light chain 1	248.005	3.12023	1.16993	2.66703	0.00765242	0.0456124
CS	citrate synthase	17.4924	3.11418	0.770053	4.04412	5.252e-05	0.00301448
RPS7	ribosomal protein S7	11.3042	3.09152	0.915118	3.37827	0.000729422	0.0103842
RPL5	ribosomal protein L5	23.6588	3.07125	0.765583	4.01165	6.02956e-05	0.00307083
RPS4X	ribosomal protein S4 X-linked	29.7035	3.07103	0.898422	3.41824	0.000630267	0.00961966
ATP5F1C	ATP synthase F1 subunit gamma	11.2048	3.06084	0.977417	3.13156	0.0017388	0.0174653
CA3	carbonic anhydrase 3	392.239	3.06024	0.616096	4.96715	6.79434e-07	0.000188987
PPP1R12B	protein phosphatase 1 regulatory subunit 12B	11.7234	3.04626	0.94585	3.22066	0.00127897	0.0144977
COL3A1	collagen type III alpha 1 chain	86.2556	3.03503	0.64461	4.70833	2.4976e-06	0.000442754
CYR61	cysteine rich angiogenic inducer 61	10.2581	3.02184	1.07887	2.80093	0.00509555	0.0354829
BTG2	BTG anti-proliferation factor 2	25.1378	3.01249	0.805319	3.74074	0.00018348	0.00522413
RTN4	reticulon 4	14.8383	2.99879	0.988449	3.03383	0.00241472	0.0212594
SLC25A3	solute carrier family 25 member 3	22.8157	2.98938	0.931497	3.20922	0.00133096	0.0149464
MYOM1	myomesin 1	65.1625	2.95919	0.673005	4.39698	1.09767e-05	0.00124037
AHNAK	AHNAK nucleoprotein	60.5649	2.95682	0.566865	5.21609	1.82739e-07	7.34205e-05
C3	complement C3	12.6043	2.95652	0.793496	3.72594	0.00019459	0.00545457
DUSP3	dual specificity phosphatase 3	15.4359	2.95594	0.901583	3.27861	0.0010432	0.0124696
SYNE2	spectrin repeat containing nuclear envelope protein 2	12.6131	2.94547	0.90439	3.25685	0.00112654	0.0131406
LAMC1	laminin subunit gamma 1	10.2446	2.93909	0.920838	3.19175	0.00141413	0.0154524
PFKFB3	6-phosphofructo-2-kinase/fructose-2,6-biphosphatase 3	22.4678	2.92636	0.92502	3.16357	0.00155847	0.0165262
RPL23A	ribosomal protein L23a	39.3338	2.88359	0.778533	3.70388	0.00021233	0.00564547
FSTL1	follistatin like 1	14.9705	2.8629	1.00501	2.84862	0.00439088	0.0319465
KIAA0100	bridge-like lipid transfer protein family member 2	10.8918	2.85482	0.900668	3.16967	0.00152611	0.0163888
FBP2	fructose-bisphosphatase 2	20.8086	2.85411	0.927643	3.07674	0.00209279	0.0193807
YWHAG	tyrosine 3-monooxygenase/tryptophan 5-monooxygenase activation protein gamma	21.1454	2.85255	0.84176	3.38879	0.000702015	0.0102358
RPS12	ribosomal protein S12	25.076	2.84913	0.857137	3.32401	0.000887328	0.0114184
MDH1	malate dehydrogenase 1	12.3	2.84761	0.97782	2.9122	0.00358889	0.0278485
SPTBN1	spectrin beta, non-erythrocytic 1	15.2098	2.83482	0.808066	3.50815	0.000451229	0.00802153
PTP4A1	protein tyrosine phosphatase 4A1	11.7487	2.83421	0.78331	3.61825	0.000296606	0.00683139
UBC	ubiquitin C	143.154	2.82356	0.601186	4.69665	2.64466e-06	0.000442754
SMYD1	SET and MYND domain containing 1	22.6186	2.822	0.753448	3.74545	0.00018007	0.0051919
PPP3CB	protein phosphatase 3 catalytic subunit beta	15.2126	2.80484	0.894916	3.13419	0.00172328	0.0174061
RPS27A	ribosomal protein S27a	18.4335	2.79679	0.737084	3.7944	0.000148003	0.00461362
NDUFS2	NADH:ubiquinone oxidoreductase core subunit S2	11.5627	2.76917	0.955131	2.89926	0.00374047	0.0286558
ST13	ST13 Hsp70 interacting protein	14.8266	2.75538	0.809883	3.4022	0.000668462	0.00990639
NDUFV1	NADH:ubiquinone oxidoreductase core subunit V1	14.8524	2.75142	0.888057	3.09824	0.00194672	0.0187382
FBN1	fibrillin 1	8.84624	2.74229	0.817748	3.35347	0.000798064	0.0108489
UNC45B	unc-45 myosin chaperone B	17.8086	2.73498	0.737863	3.70662	0.00021004	0.00564547
TSC22D1	TSC22 domain family member 1	12.496	2.71463	0.806007	3.368	0.00075716	0.01049
SMOC2	SPARC related modular calcium binding 2	11.1085	2.71144	0.87623	3.09444	0.00197183	0.0187433
ATP5F1E	ATP synthase F1 subunit epsilon	14.2394	2.70595	0.968448	2.79411	0.00520435	0.0358456
EEF1B2	eukaryotic translation elongation factor 1 beta 2	28.8015	2.7054	0.879425	3.07633	0.00209564	0.0193807
COL4A1	collagen type IV alpha 1 chain	16.1716	2.69508	0.762988	3.53227	0.000412005	0.00767943
ACTB	actin beta	29.8239	2.68234	0.758164	3.53794	0.000403265	0.00767943
CKMT2	creatine kinase, mitochondrial 2	25.7872	2.67497	0.775827	3.4479	0.000564964	0.00920229
UBR4	ubiquitin protein ligase E3 component n-recognin 4	12.0188	2.67373	0.773752	3.45553	0.000549203	0.00906812
GOT2	glutamic-oxaloacetic transaminase 2	15.096	2.66871	0.827282	3.22588	0.00125586	0.0143709
VIM	vimentin	30.4158	2.66044	0.738748	3.60128	0.000316656	0.00696887
SSH2	slingshot protein phosphatase 2	8.93117	2.66039	0.806162	3.30007	0.000966594	0.0120926
UQCRB	ubiquinol-cytochrome c reductase binding protein	17.5216	2.65204	0.772752	3.43195	0.000599266	0.00950415
PRRC2B	proline rich coiled-coil 2B	10.3738	2.63801	0.700168	3.76768	0.000164773	0.00504933
SCN1B	sodium voltage-gated channel beta subunit 1	15.6419	2.63491	0.999765	2.63553	0.00840056	0.0485308
NDUFA4	NDUFA4 mitochondrial complex associated	23.3281	2.63103	0.806214	3.26344	0.00110067	0.0128803
LIMCH1	LIM and calponin homology domains 1	11.982	2.62474	0.814927	3.22083	0.0012782	0.0144977
RPL4	ribosomal protein L4	62.428	2.62107	0.626378	4.18449	2.85813e-05	0.0019676
ACAT1	acetyl-CoA acetyltransferase 1	9.61025	2.60134	0.860032	3.0247	0.0024888	0.0217581
AKAP1	A-kinase anchoring protein 1	8.80091	2.5847	0.772595	3.34548	0.000821406	0.0109199
BCL6	BCL6 transcription repressor	13.7339	2.56915	0.864912	2.97041	0.00297399	0.0244408
MAP4	microtubule associated protein 4	54.0517	2.56894	0.485448	5.2919	1.21055e-07	6.25335e-05
MYOT	myotilin	35.3502	2.5593	0.689542	3.71159	0.000205961	0.00559966
CCDC80	coiled-coil domain containing 80	23.436	2.55787	0.849356	3.01154	0.0025993	0.0223256
PARVB	parvin beta	11.2508	2.55753	0.973382	2.62747	0.00860223	0.0493815
TNXB	tenascin XB	12.8697	2.55614	0.720118	3.54961	0.000385799	0.00754082
ATP5F1B	ATP synthase F1 subunit beta	49.2639	2.535	0.940205	2.69622	0.00701312	0.0432755
NACA	nascent polypeptide associated complex subunit alpha	34.8745	2.53439	0.639963	3.96022	7.48811e-05	0.00342747
HADHA	hydroxyacyl-CoA dehydrogenase trifunctional multienzyme complex subunit alpha	20.229	2.52828	0.769211	3.28684	0.00101317	0.0123861
XRCC6	X-ray repair cross complementing 6	12.8745	2.5159	0.850004	2.95987	0.00307764	0.0250085
CMYA5	cardiomyopathy associated 5	83.9622	2.51398	0.692982	3.62777	0.000285875	0.00666918
KMT2D	lysine methyltransferase 2D	9.01713	2.50943	0.818136	3.06726	0.00216034	0.0196771
RPL21	ribosomal protein L21	29.2803	2.49803	0.882238	2.83146	0.00463354	0.0330471
TMSB4X	thymosin beta 4 X-linked	22.5119	2.48815	0.754329	3.29849	0.00097207	0.0120926
APOBEC2	apolipoprotein B mRNA editing enzyme catalytic subunit 2	37.7269	2.48208	0.912936	2.71878	0.00655226	0.0414213
PCNT	pericentrin	12.6579	2.47188	0.863385	2.86301	0.00419638	0.0307635
MFN2	mitofusin 2	16.5358	2.46982	0.731421	3.37674	0.000733493	0.0104012
MYH2	myosin heavy chain 2	1010.33	2.46858	0.675272	3.65568	0.000256499	0.00639655
THRAP3	thyroid hormone receptor associated protein 3	9.08212	2.46643	0.829267	2.97423	0.00293726	0.0243047
C12orf75	chromosome 12 open reading frame 75	9.97266	2.46399	0.780286	3.1578	0.00158965	0.0167586
PFKM	phosphofructokinase, muscle	69.4968	2.43679	0.682689	3.5694	0.000357806	0.00726869
TPM3	tropomyosin 3	237.417	2.43142	0.5209	4.66773	3.0454e-06	0.00047879
TOMM7	translocase of outer mitochondrial membrane 7	10.9529	2.42461	0.903212	2.68443	0.00726531	0.0443773
DAG1	dystroglycan 1	12.775	2.42211	0.831529	2.91284	0.00358163	0.0278485
RPS3A	ribosomal protein S3A	50.2975	2.42138	0.78439	3.08695	0.00202219	0.018846
MDH2	malate dehydrogenase 2	23.6932	2.41694	0.889727	2.7165	0.00659765	0.0416354
BTF3	basic transcription factor 3	13.0018	2.41688	0.726502	3.32674	0.000878687	0.0113883
STAT3	signal transducer and activator of transcription 3	9.26734	2.4138	0.849238	2.84231	0.00447879	0.0322615
RPS6	ribosomal protein S6	31.3195	2.41191	0.670123	3.59921	0.000319187	0.00696887
G0S2	G0/G1 switch 2	41.7558	2.40519	0.551891	4.35809	1.31201e-05	0.00129011
TTN	titin	648.373	2.4039	0.597826	4.02107	5.79344e-05	0.00303497
JPH1	junctophilin 1	13.4383	2.39637	0.706593	3.39145	0.000695251	0.0102196
IGF2R	insulin like growth factor 2 receptor	15.2433	2.35487	0.717976	3.27987	0.00103854	0.0124696
GLUL	glutamate-ammonia ligase	39.6316	2.35459	0.885528	2.65897	0.00783794	0.0459352
COL1A2	collagen type I alpha 2 chain	46.7839	2.34558	0.674489	3.47757	0.000505984	0.00854971
ACTN2	actinin alpha 2	226.005	2.3403	0.542591	4.31321	1.60904e-05	0.00138531
MAGED2	MAGE family member D2	11.4894	2.3345	0.843806	2.76663	0.00566387	0.0377931
RPL10A	ribosomal protein L10a	31.9371	2.32114	0.748401	3.10146	0.00192569	0.0186184
COX7A1	cytochrome c oxidase subunit 7A1	47.8543	2.31704	0.712676	3.25118	0.00114927	0.0133198
CLIC5	chloride intracellular channel 5	27.2745	2.3156	0.588813	3.93266	8.40097e-05	0.00361642
IGFBP5	insulin like growth factor binding protein 5	96.1451	2.31156	0.59669	3.87398	0.000107074	0.00409945
SYNM	SYNM – synemin	56.9914	2.31043	0.581708	3.9718	7.13318e-05	0.00334981
MYOM2	myomesin 2	76.5519	2.3078	0.597438	3.86282	0.000112084	0.00410779
RPL7	ribosomal protein L7	21.5321	2.30666	0.727758	3.16954	0.00152681	0.0163888
FXR1	FMR1 autosomal homolog 1	13.0028	2.30229	0.64737	3.55637	0.00037601	0.00742979
NRAP	nebulin related anchoring protein	143.364	2.28797	0.504194	4.53788	5.68229e-06	0.000786434
SIRT2	sirtuin 2	16.4532	2.27984	0.803778	2.8364	0.00456249	0.0326465
ANXA2	annexin A2	16.2007	2.25726	0.847191	2.6644	0.00771262	0.0456124
RACK1	receptor for activated C kinase 1	36.7698	2.25238	0.728714	3.0909	0.00199554	0.018846
RPL23	ribosomal protein L23	32.1133	2.2426	0.686534	3.26655	0.00108866	0.0128447
FN1	fibronectin 1	24.4521	2.24215	0.780708	2.87195	0.00407952	0.0302907
RPS27	ribosomal protein S27	37.8669	2.21521	0.634738	3.48997	0.000483082	0.0082648
HDLBP	high density lipoprotein binding protein	32.887	2.21474	0.631359	3.5079	0.000451667	0.00802153
DYNC1H1	dynein cytoplasmic 1 heavy chain 1	18.3816	2.21383	0.70559	3.13755	0.00170364	0.017401
ASB2	ankyrin repeat and SOCS box containing 2	52.1935	2.19856	0.698666	3.1468	0.0016507	0.0171577
SELENOW	selenoprotein W	34.0833	2.1858	0.826133	2.64581	0.00814944	0.0473768
COL15A1	collagen type XV alpha 1 chain	13.8722	2.18565	0.781741	2.79588	0.00517593	0.0357862
C1orf21	chromosome 1 open reading frame 21	12.1648	2.17823	0.71522	3.04554	0.00232265	0.0208061
PPP1R3C	protein phosphatase 1 regulatory subunit 3C	18.5329	2.17645	0.823378	2.64332	0.00820974	0.0476508
RNF115	ring finger protein 115	9.12825	2.16899	0.752727	2.88151	0.00395774	0.029753
DGKD	diacylglycerol kinase delta	10.6187	2.16409	0.695435	3.11184	0.00185922	0.0182454
WNK1	WNK lysine deficient protein kinase 1	16.3612	2.16006	0.691512	3.12368	0.00178607	0.0177429
PIP4K2B	phosphatidylinositol-5-phosphate 4-kinase type 2 beta	14.4419	2.15483	0.80085	2.69068	0.00713063	0.043851
CSRP3	cysteine and glycine rich protein 3	57.641	2.14653	0.735016	2.92038	0.003496	0.0275415
NEB	nebulin	249.67	2.10901	0.578441	3.64602	0.000266337	0.00647652
RPS23	ribosomal protein S23	28.967	2.1037	0.593626	3.54382	0.000394375	0.00766699
A2M	alpha-2-macroglobulin	21.1937	2.0979	0.769077	2.72781	0.00637566	0.0409491
FAU	FAU ubiquitin like and ribosomal protein S30 fusion	19.8349	2.08662	0.777576	2.68349	0.00728589	0.0444279
LMOD2	leiomodin 2	53.2624	2.07432	0.688057	3.01475	0.00257195	0.0221961
CAND2	cullin associated and neddylation dissociated 2 (putative)	13.4207	2.07033	0.766249	2.7019	0.00689452	0.0427626
PSMC1	proteasome 26S subunit, ATPase 1	15.3955	2.05948	0.59958	3.43488	0.000592821	0.00944335
YBX1	Y-box binding protein 1	74.5754	2.05558	0.489683	4.19777	2.6955e-05	0.0019676
VCP	valosin containing protein	23.3381	2.04949	0.702384	2.9179	0.00352397	0.0276302
LRRC20	leucine rich repeat containing 20	17.4274	2.04745	0.714207	2.86675	0.00414707	0.0305849
ALDOA	aldolase, fructose-bisphosphate A	415.923	2.03511	0.636092	3.1994	0.00137713	0.0153221
MLXIP	MLX interacting protein	16.8982	2.03366	0.763085	2.66505	0.00769761	0.0456124
HSPA8	heat shock protein family A (Hsp70) member 8	59.0573	2.02737	0.649772	3.12013	0.00180769	0.0179085
EIF4B	eukaryotic translation initiation factor 4B	28.1853	2.02725	0.714012	2.83924	0.00452216	0.0325092
CILP	cartilage intermediate layer protein	16.5262	2.02553	0.740529	2.73525	0.00623334	0.0402496
SERBP1	SERPINE1 mRNA binding protein 1	12.09	2.00424	0.652103	3.07351	0.0021156	0.0194162
GSN	gelsolin	88.6321	2.00329	0.539325	3.71443	0.000203661	0.00558747
TACC2	transforming acidic coiled-coil containing protein 2	50.69	1.99275	0.446653	4.46151	8.13848e-06	0.00101478
TSPAN3	tetraspanin 3	13.7978	1.98141	0.714427	2.77342	0.00554699	0.0374915
SRL	sarcalumenin	60.6301	1.98058	0.603912	3.27959	0.00103958	0.0124696
TIMP3	TIMP metallopeptidase inhibitor 3	19.7077	1.97347	0.665003	2.96761	0.00300121	0.0245529
PGM1	phosphoglucomutase 1	61.9246	1.97193	0.667999	2.95199	0.00315735	0.0254276
MYBPC1	myosin binding protein C1	662.071	1.97072	0.498169	3.95592	7.62392e-05	0.00344601
LARP1	La ribonucleoprotein 1, translational regulator	15.1889	1.97066	0.651741	3.02369	0.00249713	0.0217581
RPL30	ribosomal protein L30	32.6724	1.96959	0.676286	2.91236	0.00358714	0.0278485
MYOM3	myomesin 3	52.803	1.96068	0.594856	3.29606	0.000980508	0.0120926
MORF4L1	mortality factor 4 like 1	15.8013	1.94398	0.65312	2.97646	0.00291601	0.0242397
CANX	calnexin	10.308	1.93141	0.71837	2.68859	0.00717537	0.0439747
MT-CO1	mitochondrially encoded cytochrome c oxidase I	1197.99	1.91809	0.49176	3.90045	9.60128e-05	0.00384064
FLNA	filamin A	14.5245	1.905	0.688539	2.76673	0.00566212	0.0377931
ACTG1	actin gamma 1	20.0633	1.90224	0.621353	3.06145	0.00220268	0.0200123
APP	amyloid beta precursor protein	18.342	1.89321	0.58722	3.22402	0.00126405	0.0144189
MYL3	myosin light chain 3	96.4294	1.88481	0.660763	2.85248	0.00433798	0.0316891
ADSSL1	adenylosuccinate synthetase like 1	33.0171	1.87487	0.627863	2.98611	0.00282547	0.0236503
RPS24	ribosomal protein S24	45.6346	1.86235	0.611696	3.04457	0.00233016	0.0208061
SERPINF1	serpin family F member 1	29.4279	1.86201	0.498664	3.73399	0.00018847	0.00532429
DNAJB6	DnaJ heat shock protein family (Hsp40) member B6	16.6383	1.85955	0.676407	2.74916	0.00597486	0.0390689
HNRNPC	heterogeneous nuclear ribonucleoprotein C	10.9057	1.84943	0.690687	2.67766	0.00741386	0.0449389
LRP1	LDL receptor related protein 1	15.8369	1.84692	0.53506	3.4518	0.000556869	0.0091529
GAPDH	glyceraldehyde-3-phosphate dehydrogenase	937.793	1.83062	0.672158	2.72349	0.00645954	0.0411227
FEM1A	fem-1 homolog A	66.2318	1.83035	0.599521	3.05302	0.00226548	0.0204799
PDLIM3	PDZ and LIM domain 3	174.267	1.81499	0.646952	2.80545	0.00502459	0.0353481
RPL3L	ribosomal protein L3 like	51.998	1.80885	0.502652	3.59861	0.00031992	0.00696887
HLA-E	major histocompatibility complex, class I, E	21.9553	1.80173	0.602299	2.99142	0.00277685	0.0234285
YWHAE	tyrosine 3-monooxygenase/tryptophan 5-monooxygenase activation protein epsilon	25.844	1.79986	0.56982	3.15864	0.00158504	0.0167586
SVIL	supervillin	82.8418	1.79974	0.435733	4.13037	3.62188e-05	0.00233478
UBB	ubiquitin B	100.684	1.79544	0.512111	3.50597	0.000454954	0.00802495
LDB3	LIM domain binding 3	162.796	1.79256	0.537695	3.33379	0.000856728	0.0111839
MYH7	myosin heavy chain 7	2939.26	1.7879	0.411478	4.34508	1.39224e-05	0.00129085
DUSP27	dual specificity phosphatase 27 (putative)	18.5045	1.78565	0.59935	2.9793	0.00288903	0.0241142
CTSB	cathepsin B	23.1966	1.78251	0.507911	3.50949	0.00044897	0.00802153
LMOD3	leiomodin 3	20.4682	1.77943	0.653213	2.72412	0.00644722	0.0411166
SPARC	secreted protein acidic and cysteine rich	71.9792	1.77704	0.496216	3.58119	0.000342033	0.007108
SCN4A	sodium voltage-gated channel alpha subunit 4	21.2884	1.7471	0.645202	2.70784	0.00677221	0.0422213
SET	SET nuclear proto-oncogene	10.6183	1.73908	0.639311	2.72025	0.00652334	0.0413832
TLN1	talin 1	21.9578	1.73908	0.595771	2.91904	0.00351106	0.0276
RPL14	ribosomal protein L14	38.4264	1.73616	0.548683	3.16423	0.00155492	0.0165262
UBE2A	ubiquitin conjugating enzyme E2 A	11.5805	1.73246	0.625331	2.77046	0.00559764	0.0376929
PKD1	polycystin 1, transient receptor potential channel interacting	13.3247	1.72339	0.635144	2.71338	0.00666009	0.0418833
PYGM	glycogen phosphorylase, muscle associated	468.811	1.72177	0.589513	2.92066	0.00349294	0.0275415
LAMB2	laminin subunit beta 2	16.4778	1.71347	0.62142	2.75734	0.00582733	0.0384519
EIF4ENIF1	eukaryotic translation initiation factor 4E nuclear import factor 1	11.7678	1.70462	0.612752	2.7819	0.00540416	0.036732
RPL24	ribosomal protein L24	30.0957	1.68399	0.554635	3.03621	0.00239571	0.0211806
RPS3	ribosomal protein S3	32.3942	1.6554	0.621378	2.66407	0.00772013	0.0456124
GNAS	GNAS complex locus	104.172	1.65508	0.557514	2.96867	0.00299092	0.0245242
MT-ND1	mitochondrially encoded NADH dehydrogenase 1	416.209	1.64385	0.480587	3.42051	0.000625043	0.00961769
TCEA3	transcription elongation factor A3	43.0555	1.62853	0.496781	3.27816	0.00104488	0.0124696
NFE2L1	NFE2 like bZIP transcription factor 1	170.794	1.62759	0.526594	3.09079	0.00199626	0.018846
ATP1A2	ATPase Na+/K+ transporting subunit alpha 2	124.477	1.61187	0.355748	4.53094	5.87215e-06	0.000786434
MT-ND2	mitochondrially encoded NADH dehydrogenase 2	442.452	1.60966	0.395229	4.07273	4.64661e-05	0.00275445
VDAC1	voltage dependent anion channel 1	31.6789	1.57637	0.573333	2.74948	0.00596891	0.0390689
EPHX1	epoxide hydrolase 1	27.0731	1.56596	0.505477	3.09798	0.00194844	0.0187382
ZNF106	zinc finger protein 106	51.3988	1.56447	0.587568	2.66262	0.0077536	0.0456629
COQ8A	coenzyme Q8A	64.4463	1.54601	0.563852	2.74186	0.00610922	0.0396606
RNF10	ring finger protein 10	18.9535	1.54461	0.530875	2.90955	0.00361952	0.0280261
COL5A1	collagen type V alpha 1 chain	18.2183	1.53029	0.564923	2.70885	0.00675168	0.0421739
CACNA1S	calcium voltage-gated channel subunit alpha1 S	57.2168	1.52738	0.547835	2.78803	0.00530288	0.0363035
HSP90AB1	heat shock protein 90 alpha family class B member 1	86.114	1.50741	0.484601	3.11062	0.00186692	0.0182454
TSPAN31	tetraspanin 31	234.72	0.306221	-3.52102	0.000429895	0.00789087	0.0182454
P2RY11	purinergic receptor P2Y11	302.546	0.295876	-3.51431	0.000440901	0.00801155	0.0374915
GPANK1	G-patch domain and ankyrin repeats 1	111.301	0.291268	-3.52658	0.000420967	0.00777098	0.00777098
HAS3	hyaluronan synthase 3	156.653	0.290804	-3.52642	0.000421214	0.00777098	0.00777098
POLR2B	RNA polymerase II subunit B	314.811	0.278454	-3.51156	0.000445483	0.00802153	0.00802153
MYL5	myosin light chain 5	1308.2	0.255854	-3.51831	0.000434309	0.00793162	0.00793162
ZNF232	zinc finger protein 232	25.0584	-1.5022	0.485199	-3.09606	0.00196113	0.0187433
SFT2D3	SFT2 domain containing 3	16.0629	-1.51036	0.569785	-2.65076	0.00803104	0.0469148
BUD23	BUD23 rRNA methyltransferase and ribosome maturation factor	56.5679	-1.51408	0.392788	-3.8547	0.000115872	0.00410779
THOC6	THO complex 6	49.151	-1.54414	0.409145	-3.77407	0.000160604	0.00496363
STBD1	starch binding domain 1	162.718	-1.59417	0.39465	-4.03945	5.35771e-05	0.0030271
SYN2	synapsin II	28.0514	-1.66911	0.439027	-3.80184	0.000143625	0.00459599
SGMS2	sphingomyelin synthase 2	22.2022	-1.76627	0.483947	-3.64972	0.000262522	0.00645769
NIP7	nucleolar pre-rRNA processing protein NIP7	14.543	-1.90314	0.612261	-3.10838	0.00188113	0.0182854
CDC42SE1	CDC42 small effector 1	199	-1.90526	0.601249	-3.16884	0.00153048	0.0163888
TMEM102	transmembrane protein 102	16.9222	-1.91041	0.615822	-3.10221	0.00192078	0.0186184
TARBP2	TARBP2 subunit of RISC loading complex	35.7673	-1.96184	0.540493	-3.62973	0.000283719	0.00666186
MYBPH	myosin binding protein H	11.0937	-2.89817	1.06582	-2.7192	0.00654403	0.0414213

## Sheet: GDM-C vs. GDM-I
Table S1. List of differentially expressed genes in NG-C, NG-I and GDM-C women when compared with GDM-I women. The genes were considered differentially expressed when log2 Fold Change ≥ |1.5| and the adjusted p-value (padj) ≤ 0.05. Purple color indicates genes with down-regulated transcription and orange color indicates genes with up-regulated transcription in GDM-I. The genes are identified by t…
Gene symbol	Gene name	baseMean	log2FoldChange	lfcSE	stat	pvalue	padj
MT-RNR1	s-rRNA	105.622	2.00089	0.54797	3.65145	0.000260762	0.0353689
MYH7	myosin heavy chain 7	2939.26	2.14012	0.411479	5.20104	1.98177e-07	0.00014784
UBB	ubiquitin B	100.684	2.18943	0.512	4.27623	1.90081e-05	0.00639408
TPM3	tropomyosin 3	237.417	2.23056	0.521682	4.27571	1.90532e-05	0.00639408
MYOM3	myomesin 3	52.803	2.34097	0.594747	3.93608	8.28235e-05	0.0164763
G0S2	G0/G1 switch 2	41.7558	2.51962	0.553631	4.55108	5.33708e-06	0.00265431
MKNK2	MAPK interacting serine/threonine kinase 2	33.6109	2.59813	0.706468	3.67763	0.000235414	0.0351238
NACA	nascent polypeptide associated complex subunit alpha	34.8745	2.60951	0.64199	4.06471	4.80917e-05	0.0116001
COX7A1	cytochrome c oxidase subunit 7A1	47.8543	2.61018	0.712972	3.66099	0.000251243	0.0353689
ATP2A2	ATPase sarcoplasmic/endoplasmic reticulum Ca2+ transporting 2	131.955	2.61951	0.711277	3.68282	0.000230668	0.0351238
UBC	ubiquitin C	143.154	3.09834	0.601334	5.15245	2.57106e-07	0.000153441
EEF1A1	eukaryotic translation elongation factor 1 alpha 1	29.2866	3.41732	0.921313	3.70918	0.00020793	0.0344702
EIF1	eukaryotic translation initiation factor 1	48.0787	3.7972	0.891997	4.25697	2.07218e-05	0.00639408
ACTN3	actinin alpha 3	67.0294	6.00004	1.08083	5.55135	2.83469e-08	4.22936e-05
