# Supplementary material for: Transcriptomic Profiling of Rectus Abdominis Muscle in Women with Gestational Diabetes-Induced Myopathy: Characterization of Pathophysiology and Potential Muscle Biomarkers of Pregnancy-Specific Urinary Incontinence
Source: Int J Mol Sci. 2022 Oct 25;23(21):12864. doi: 10.3390/ijms232112864 (PMC9658972; doi:10.3390/ijms232112864)
Supplement: Supplementary file 1 [file ijms-23-12864-s001.zip › Table S3- List of genes included in Venn diagram.xlsx]

## Sheet: Planilha1
Table S2. List of genes included in Venn diagram. The list of differentially expressed genes in Venn diagram with transcription when compared the three control groups (ND-C, ND-I and GDM-C) with GDM-I. The genes were up-regulated in GDM-I (orange) or down-regulated in GDM-I (purple). The genes are identified by the symbols (the full names can be found in the table S2).The genes are identified by …
NG-C vs. GDM-I		NG-UI vs. GDM-I		GDM-C vs. GDM-I
SKP1		SKP1		SLC19A1				Down regulation in GDM-I
DCN		AMPD1		OBSCN				Up regulation in GDM-I
EEF1A1		ACTN3		ATP1A2
EIF1		PKIA		MT-RNR1
RPS13		DCN		MYH7
SERPING1		EEF1A1		UBB
PDLIM5		ZFAND5		TPM3
FHL1		ACSL1		MYOM3
ATP5F1A		DUSP1		G0S2
ATP2A2		COX7C		MKNK2
COL3A1		PDLIM5		NACA
RPL5		AMOTL1		COX7A1
COL4A1		RPS13		ATP2A2
VIM		FEZ2		UBC
FLNA		EIF4G2		EEF1A1
UBC		NR4A1		EIF1
RPL4		ITM2B		ACTN3
TPM3		S100A9
G0S2		HBB
NACA		DAPK2
RPS27		GHITM
SERPINF1		EIF1
GSN		RPL6
MYH7		FHL1
EPHX1		USP22
SPARC		CFL2
		CAP2
		UQCRFS1
		KLHL41
		ACTR1A
		PDE4DIP
		ATP5F1A
		OPTN
		ATP2A2
		MCL1
		FKBP3
		COX6C
		HNRNPK
		SERPING1
		FYCO1
		PNRC1
		HSPA9
		NEAT1
		FBXO40
		EIF4H
		VDAC2
		HADHB
		DDX17
		CSDE1
		B2M
		TXNIP
		AQP1
		SBDS
		DDIT4L
		CNBP
		SORBS1
		MYPN
		UQCRH
		ARPC2
		NIPSNAP2
		GYG1
		PGK1
		SLC25A4
		CALM1
		MYL1
		CS
		RPS7
		RPL5
		RPS4X
		ATP5F1C
		CA3
		PPP1R12B
		COL3A1
		CYR61
		BTG2
		RTN4
		SLC25A3
		MYOM1
		AHNAK
		C3
		DUSP3
		SYNE2
		LAMC1
		PFKFB3
		RPL23A
		FSTL1
		KIAA0100
		FBP2
		YWHAG
		RPS12
		MDH1
		SPTBN1
		PTP4A1
		UBC
		SMYD1
		PPP3CB
		RPS27A
		NDUFS2
		ST13
		NDUFV1
		FBN1
		UNC45B
		TSC22D1
		SMOC2
		ATP5F1E
		EEF1B2
		COL4A1
		ACTB
		CKMT2
		UBR4
		GOT2
		VIM
		SSH2
		UQCRB
		PRRC2B
		SCN1B
		NDUFA4
		LIMCH1
		RPL4
		ACAT1
		AKAP1
		BCL6
		MAP4
		MYOT
		CCDC80
		PARVB
		TNXB
		ATP5F1B
		NACA
		HADHA
		XRCC6
		CMYA5
		KMT2D
		RPL21
		TMSB4X
		APOBEC2
		PCNT
		MFN2
		MYH2
		THRAP3
		C12orf75
		PFKM
		TPM3
		TOMM7
		DAG1
		RPS3A
		MDH2
		BTF3
		STAT3
		RPS6
		G0S2
		TTN
		JPH1
		IGF2R
		GLUL
		COL1A2
		ACTN2
		MAGED2
		RPL10A
		COX7A1
		CLIC5
		IGFBP5
		SYNM
		MYOM2
		RPL7
		FXR1
		NRAP
		SIRT2
		ANXA2
		RACK1
		RPL23
		FN1
		RPS27
		HDLBP
		DYNC1H1
		ASB2
		SELENOW
		COL15A1
		C1orf21
		PPP1R3C
		RNF115
		DGKD
		WNK1
		PIP4K2B
		CSRP3
		NEB
		RPS23
		A2M
		FAU
		LMOD2
		CAND2
		PSMC1
		YBX1
		VCP
		LRRC20
		BTF3
		MLXIP
		HSPA8
		EIF4B
		CILP
		SERBP1
		GSN
		TACC2
		TSPAN3
		SRL
		TIMP3
		PGM1
		MYBPC1
		LARP1
		RPL30
		MYOM3
		MORF4L1
		CANX
		MT-CO1
		FLNA
		ACTG1
		APP
		MYL3
		ADSSL1
		RPS24
		SERPINF1
		DNAJB6
		HNRNPC
		LRP1
		GAPDH
		FEM1A
		PDLIM3
		RPL3L
		HLA-E
		YWHAE
		SVIL
		UBB
		LDB3
		MYH7
		DUSP27
		CTSB
		LMOD3
		SPARC
		SCN4A
		SET
		TLN1
		RPL14
		UBE2A
		PKD1
		PYGM
		LAMB2
		EIF4ENIF1
		RPL24
		RPS3
		GNAS
		MT-ND1
		TCEA3
		NFE2L1
		ATP1A2
		MT-ND2
		VDAC1
		EPHX1
		ZNF106
		COQ8A
		RNF10
		COL5A1
		CACNA1S
		HSP90AB1
		TSPAN31
		P2RY11
		GPANK1
		HAS3
		POLR2B
		MYL5
		ZNF232
		SFT2D3
		BUD23
		THOC6
		STBD1
		SYN2
		SGMS2
		NIP7
		CDC42SE1
		TMEM102
		TARBP2
		MYBPH
